# Supplementary material
Source: MDPI journal article supplement (https://www.mdpi.com/search?q=molecules-25-03040)
Supplement: s001 [file molecules-25-03040-s001.pdf]

## Supplementary Materials

### **Neopapillarine, an Unusual Coumarino-alkaloid from the Root Extract of *Neocryptodiscus papillaris* with Selective Cytotoxic Activity on Renal Cancer Cells**

Fatma Tosun<sup>1</sup>, Feyyaz Mihođlugil<sup>2</sup>, John A. Beutler<sup>3</sup>, Esra Erođlu Özkan<sup>3,4</sup> and Mahmut Miski<sup>4</sup>

#### **Affiliations**

<sup>1</sup> Istanbul Medipol University, School of Pharmacy, Department of Pharmacognosy, Istanbul 34810, Turkey

<sup>2</sup> Cyprus International University, Faculty of Pharmacy, Nicosia 99258, North Cyprus

<sup>3</sup> Molecular Targets Program, Center for Cancer Research, National Cancer Institute, Frederick, MD 21702, USA

<sup>4</sup> Istanbul University, Faculty of Pharmacy, Department of Pharmacognosy, Istanbul 34116, Turkey

#### **Correspondence**

Prof. Dr. Mahmut Miski, Istanbul University, Department of Pharmacognosy, Istanbul 34116, Turkey

mahmud.miski@istanbul.edu.tr; Phone: +90-545-550-4455 Fax: +90-212-440-0252

## Table of Contents

|                                                                                                                          |    |
|--------------------------------------------------------------------------------------------------------------------------|----|
| <b>Fig. S1</b> Structures of the coumarin derivatives isolated from the roots of <i>Neocryptodiscus papillaris</i> ..... | 3  |
| <b>Fig. S2</b> <sup>1</sup> H NMR spectrum (600 MHz, CDCl <sub>3</sub> ) of 4'-Hydroxyosthol (2).....                    | 4  |
| <b>Fig. S3</b> <sup>13</sup> C NMR spectrum (125 MHz, CDCl <sub>3</sub> ) of 4'-Hydroxyosthol (2).....                   | 5  |
| <b>Fig. S4</b> 2D COSY spectrum of 4'-Hydroxyosthol (2).....                                                             | 6  |
| <b>Fig. S5</b> 2D HSQC spectrum 4'-Hydroxyosthol (2).....                                                                | 7  |
| <b>Fig. S6</b> 2D HMBC spectrum of 4'-Hydroxyosthol (2).....                                                             | 8  |
| <b>Fig. S7</b> 2D NOESY spectrum of 4'-Hydroxyosthol (2).....                                                            | 9  |
| <b>Fig. S8</b> HRESIMS spectrum of 4'-Hydroxyosthol (2).....                                                             | 10 |
| <b>Fig. S9</b> <sup>1</sup> H NMR spectrum (600 MHz, CDCl <sub>3</sub> ) of 4'-Acetoxyosthol (3).....                    | 11 |
| <b>Fig. S10</b> <sup>13</sup> C NMR spectrum (125 MHz, CDCl <sub>3</sub> ) of 4'-Acetoxyosthol (3).....                  | 12 |
| <b>Fig. S11</b> 2D COSY spectrum of 4'-Acetoxyosthol (3).....                                                            | 13 |
| <b>Fig. S12</b> 2D HSQC spectrum 4'-Acetoxyosthol (3).....                                                               | 14 |
| <b>Fig. S13</b> 2D HMBC spectrum of 4'-Acetoxyosthol (3).....                                                            | 15 |
| <b>Fig. S14</b> 2D NOESY spectrum of 4'-Acetoxyosthol (3).....                                                           | 16 |
| <b>Fig. S15</b> HRESIMS spectrum of 4'-Acetoxyosthol (3).....                                                            | 17 |
| <b>Fig. S16</b> <sup>1</sup> H NMR spectrum (600 MHz, CDCl <sub>3</sub> ) of Neopapillarine (4).....                     | 18 |
| <b>Fig. S17</b> <sup>13</sup> C NMR spectrum (125 MHz, CDCl <sub>3</sub> ) of Neopapillarine (4).....                    | 19 |
| <b>Fig. S18</b> 2D COSY spectrum of Neopapillarine (4).....                                                              | 20 |
| <b>Fig. S19</b> 2D HSQC spectrum Neopapillarine (4).....                                                                 | 21 |
| <b>Fig. S20</b> 2D HMBC spectrum of Neopapillarine (4).....                                                              | 22 |
| <b>Fig. S21</b> 2D NOESY spectrum of Neopapillarine (4).....                                                             | 23 |
| <b>Fig. S22</b> HRESIMS spectrum of Neopapillarine (4).....                                                              | 24 |
| <b>Fig. S23</b> <sup>1</sup> H NMR spectrum of Osthol (1).....                                                           | 25 |
| <b>Fig. S24</b> <sup>1</sup> H NMR spectrum of 4'-Seneciolyoxyosthol (5).....                                            | 26 |
| <b>Fig. S25</b> <sup>1</sup> H NMR spectrum of Psoralen (6).....                                                         | 27 |
| <b>Fig. S26</b> <sup>1</sup> H NMR spectrum of Bergapten (7).....                                                        | 28 |
| <b>Fig. S27</b> <sup>1</sup> H NMR spectrum of Isoimperatorin (8).....                                                   | 29 |
| <b>Fig. S28</b> <sup>1</sup> H NMR spectrum of Oxypeucedanin (9).....                                                    | 30 |
| <b>Fig. S29</b> <sup>1</sup> H NMR spectrum of Oxypeucedanin Hydrate (10).....                                           | 31 |
| <b>Fig. S30</b> <sup>1</sup> H NMR spectrum of Pranferol (11).....                                                       | 32 |
| <b>Fig. S31</b> <sup>1</sup> H NMR spectrum of Scopoletin (12).....                                                      | 33 |
| <b>Fig. S32</b> <sup>1</sup> H NMR spectrum of Scoparone (13).....                                                       | 34 |

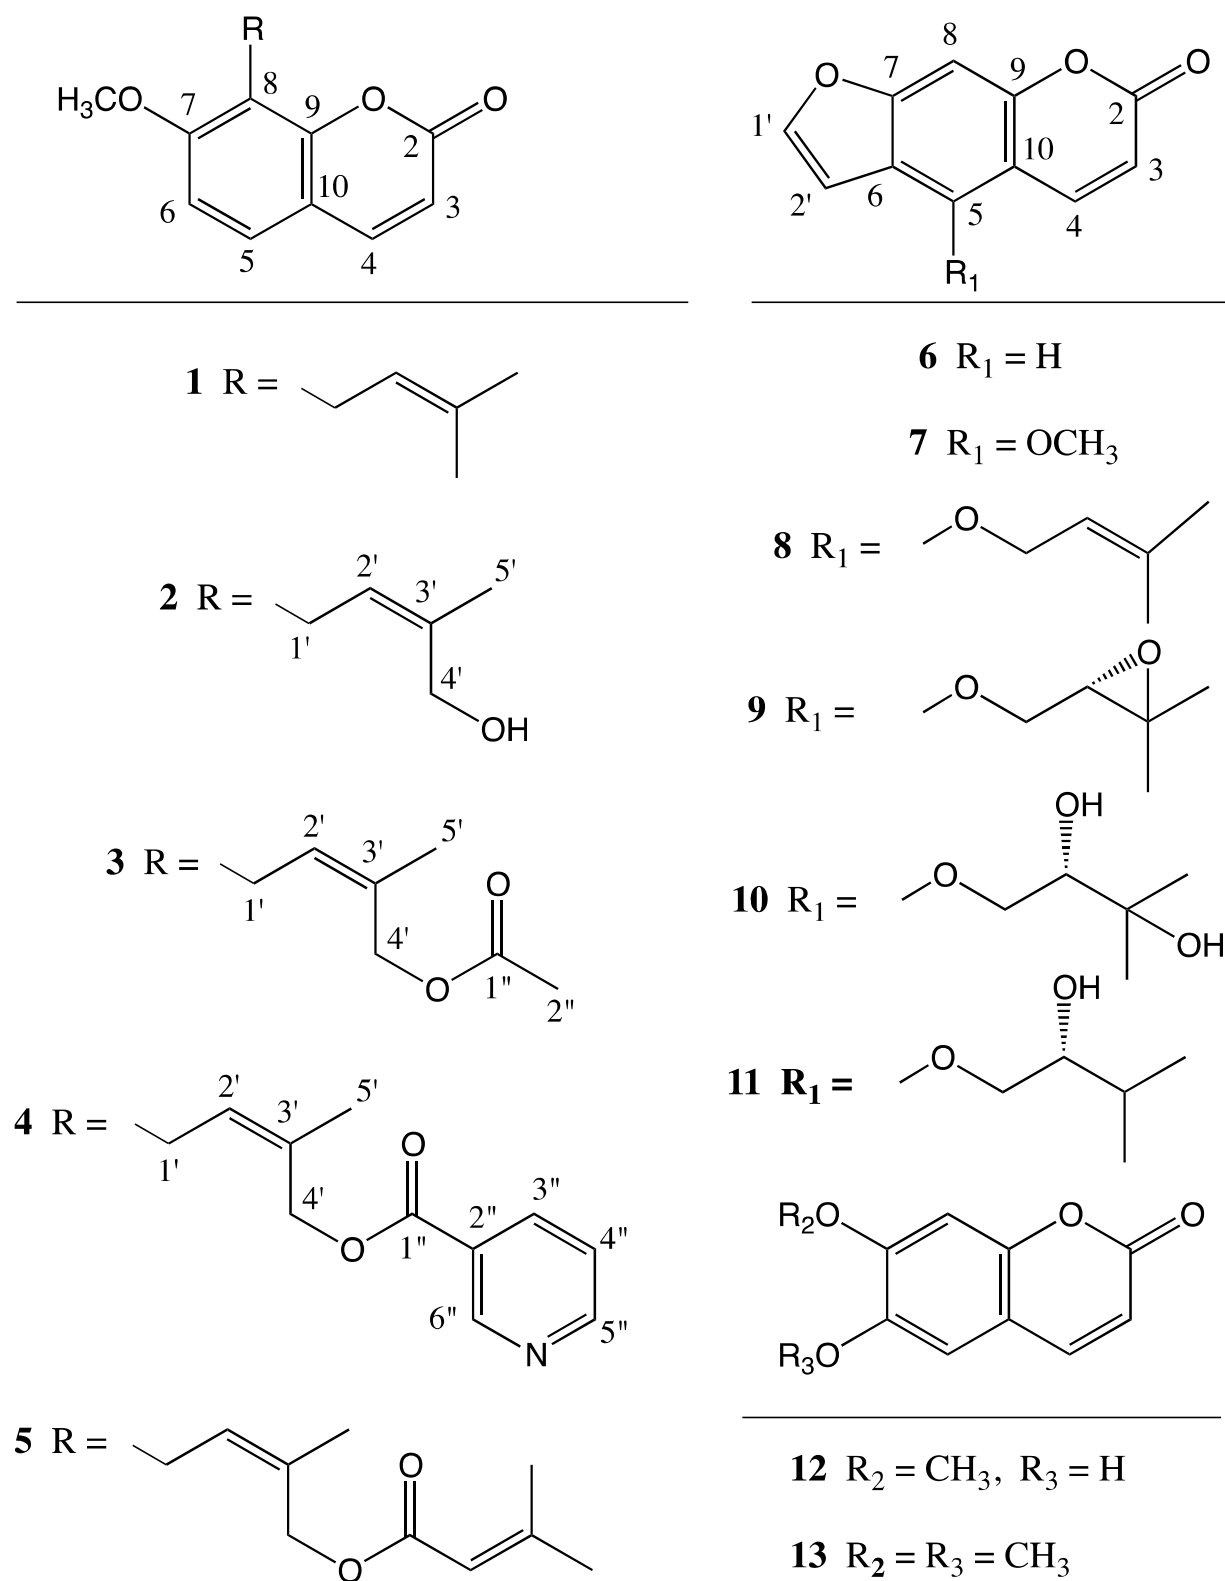

**Fig. S1** Structures of the coumarin derivatives isolated from the roots of *Neocryptodiscus papillaris*

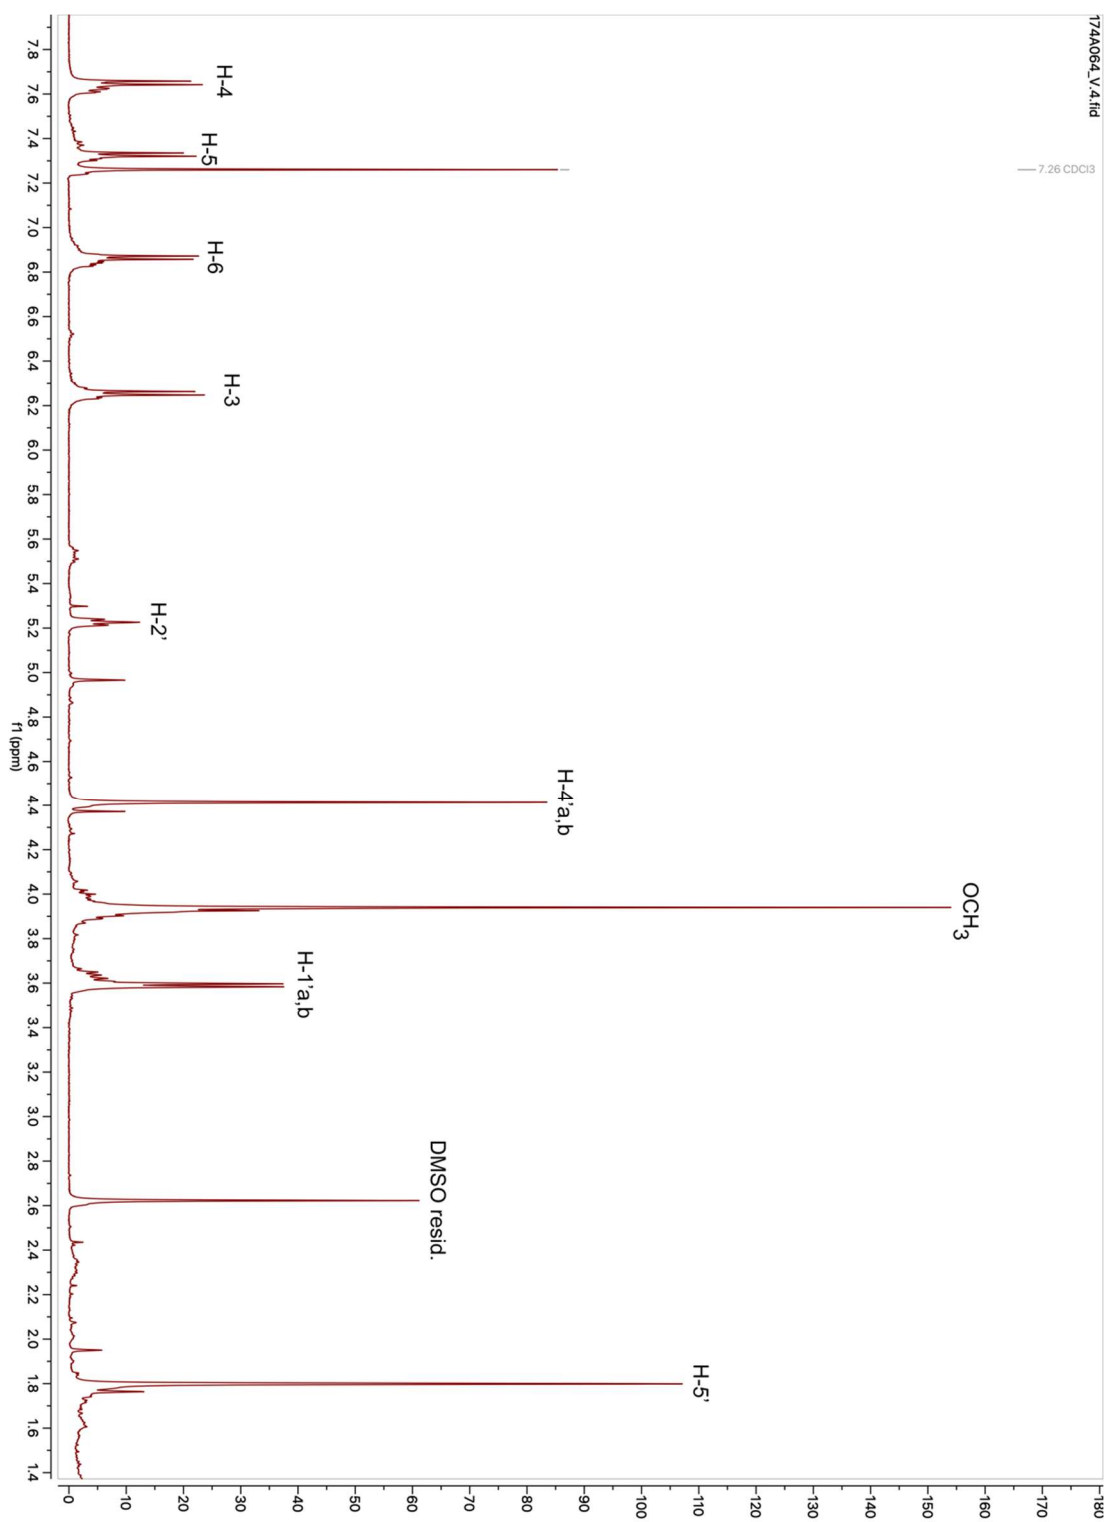

Fig. S2 <sup>1</sup>H NMR spectrum (600 MHz, CDCl<sub>3</sub>) of 4'-Hydroxyosthol (2)

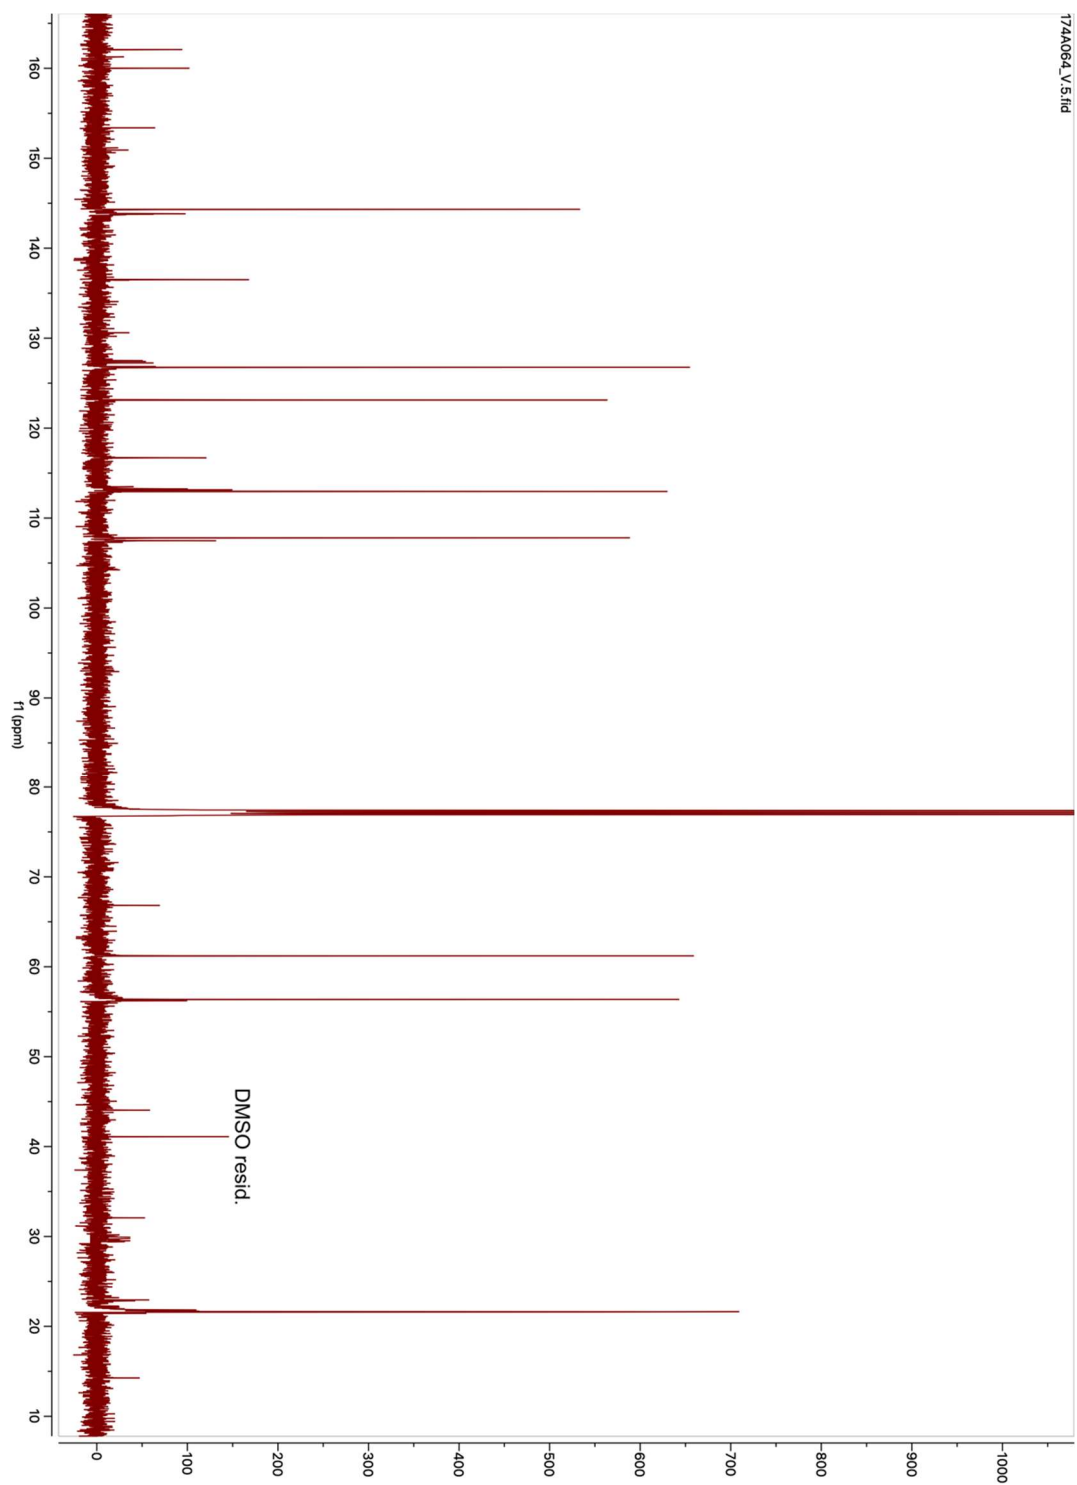

Fig. S3  $^{13}\text{C}$  NMR spectrum (125 MHz,  $\text{CDCl}_3$ ) of 4'-Hydroxyosthol (2)

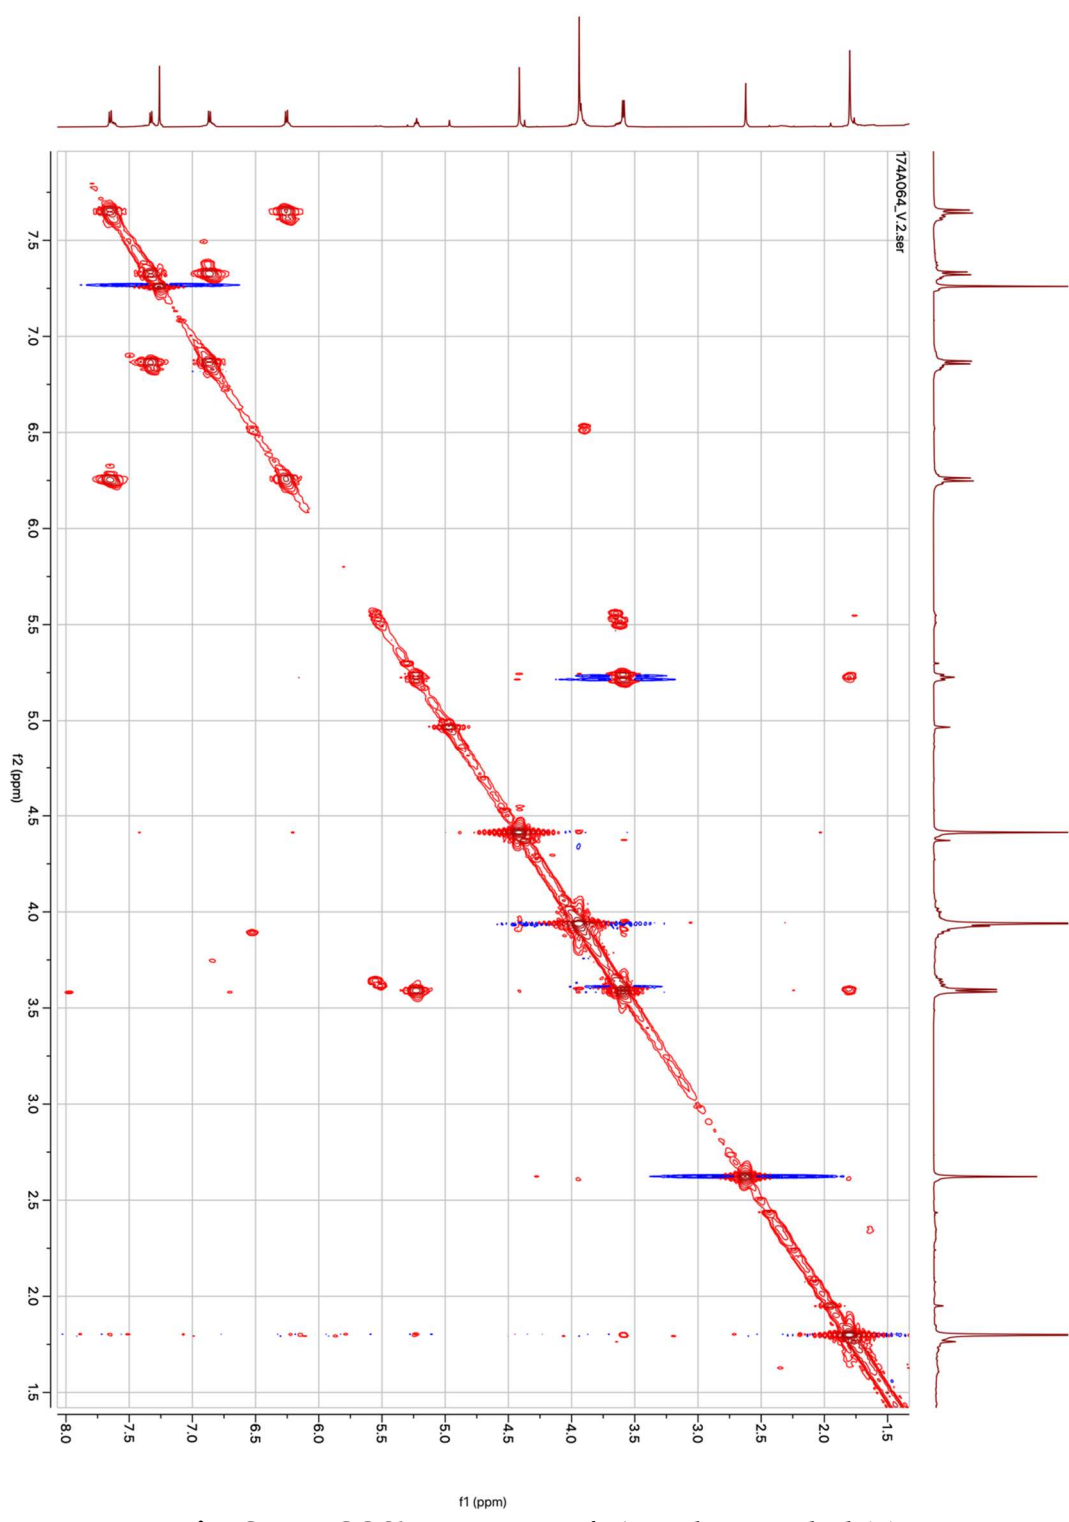

**Fig. S4** 2D COSY spectrum of 4'-Hydroxyosthol (2)

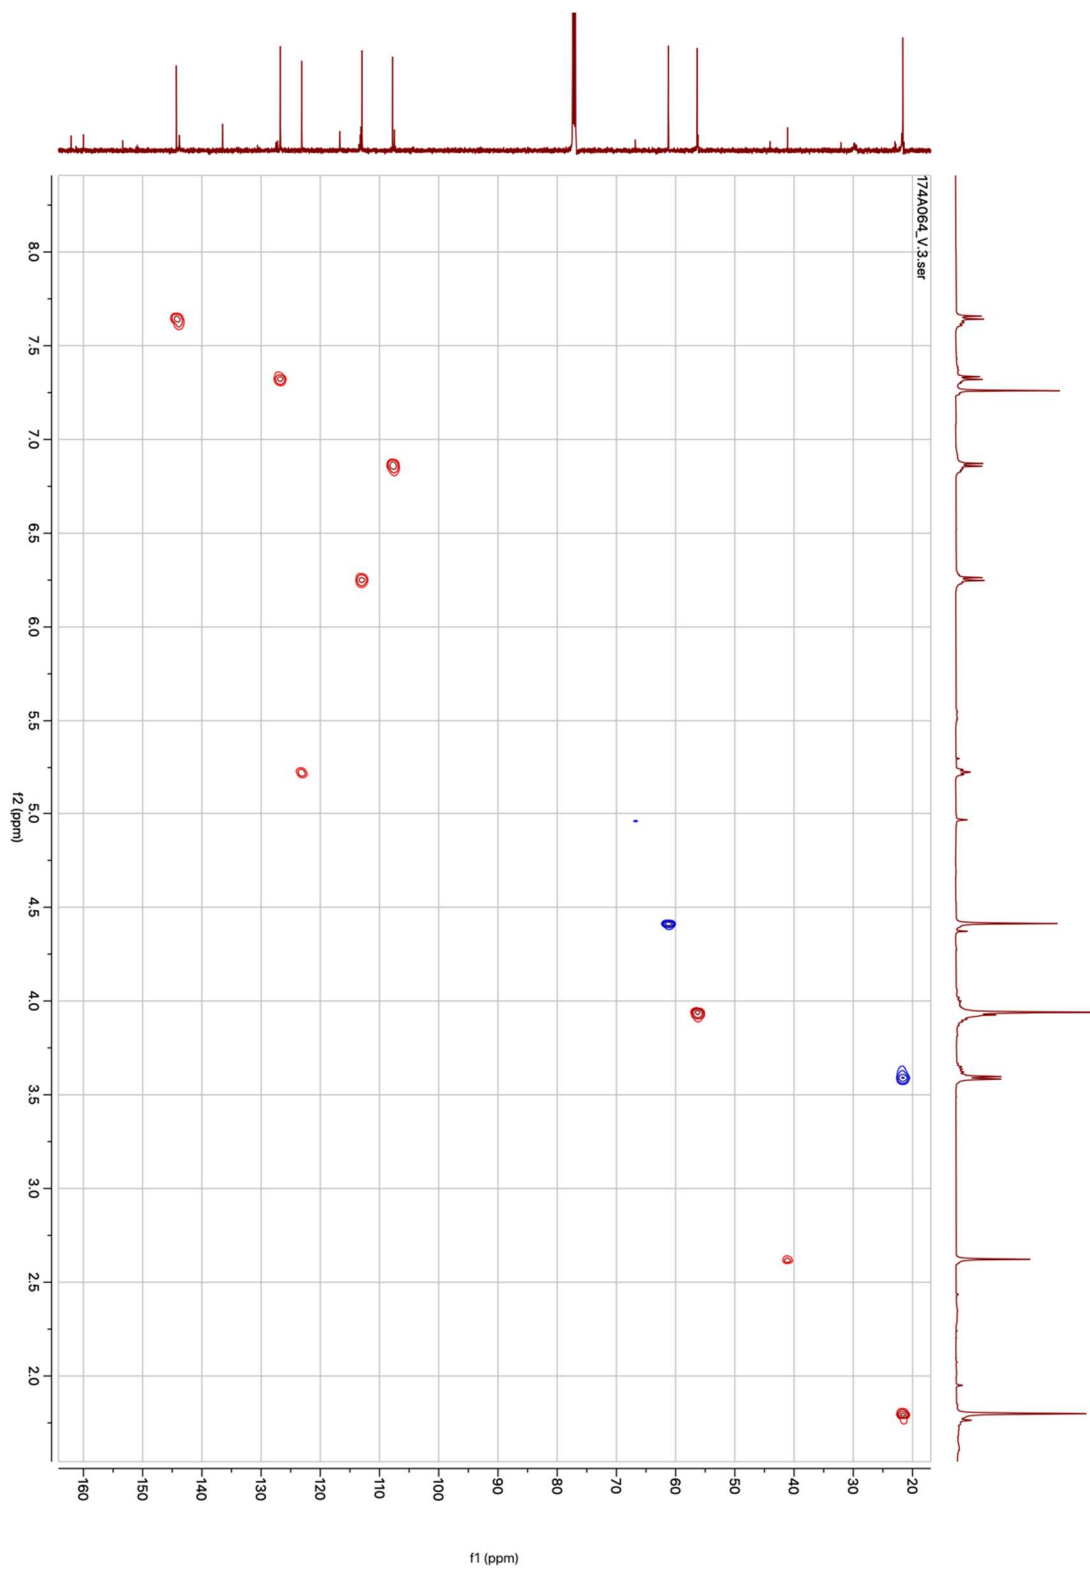

Fig. S5 2D HSQC spectrum 4'-Hydroxyosthol (2)

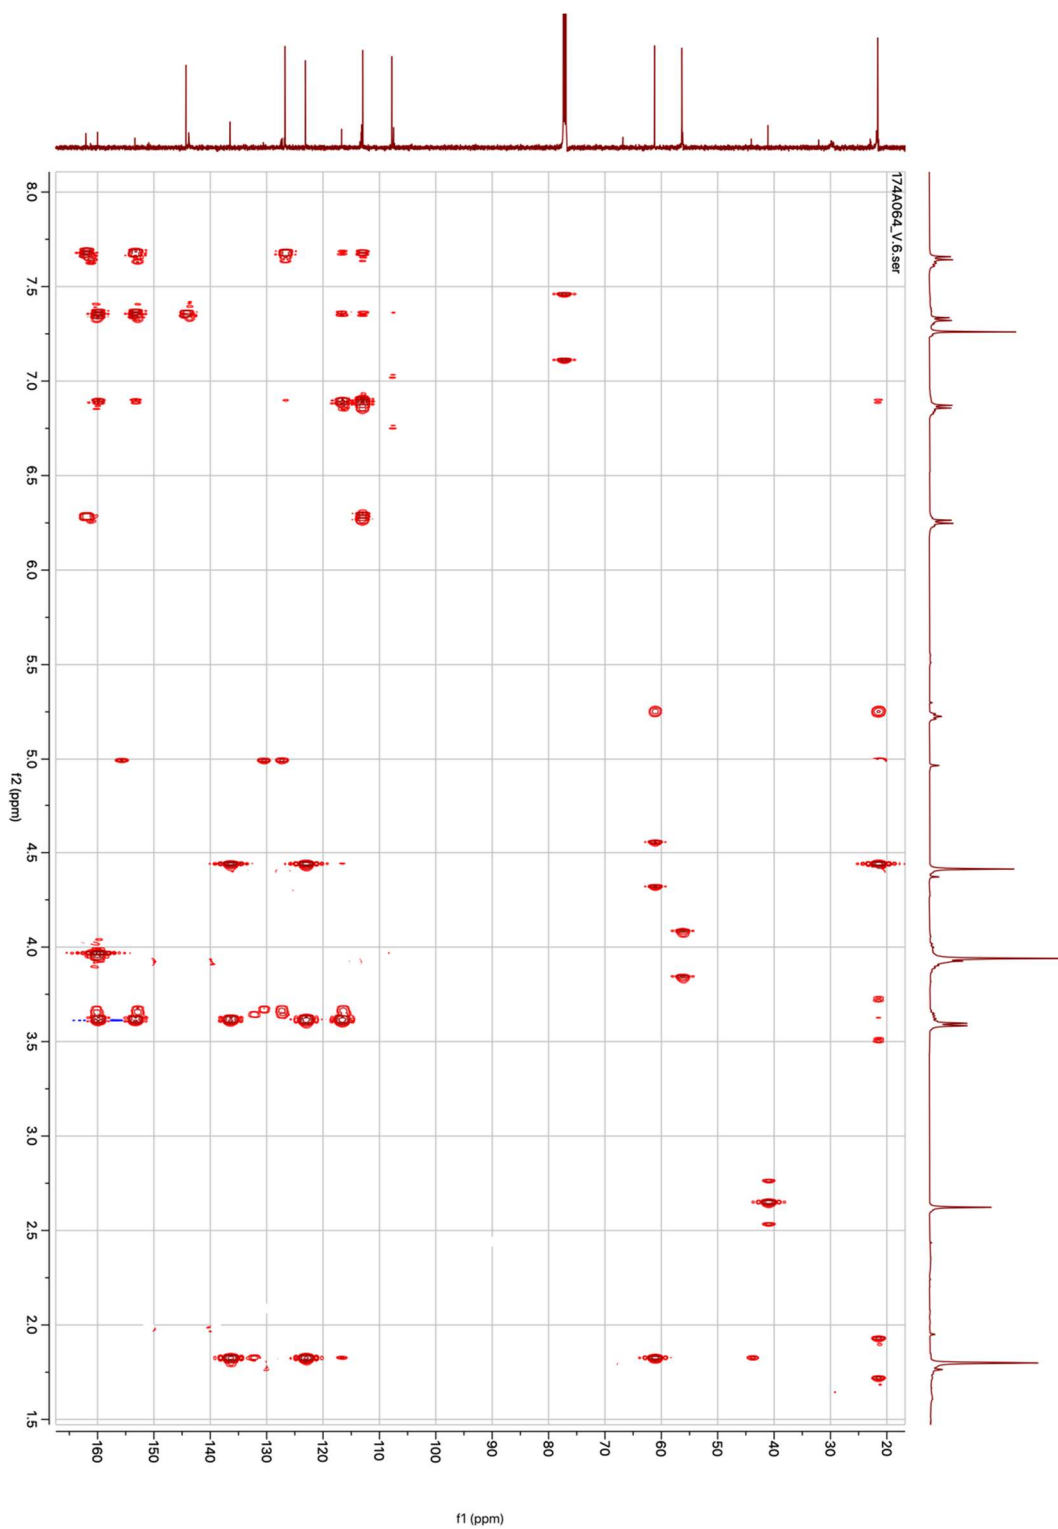

Fig. S6 2D HMBC spectrum of 4'-Hydroxyosthol (2)



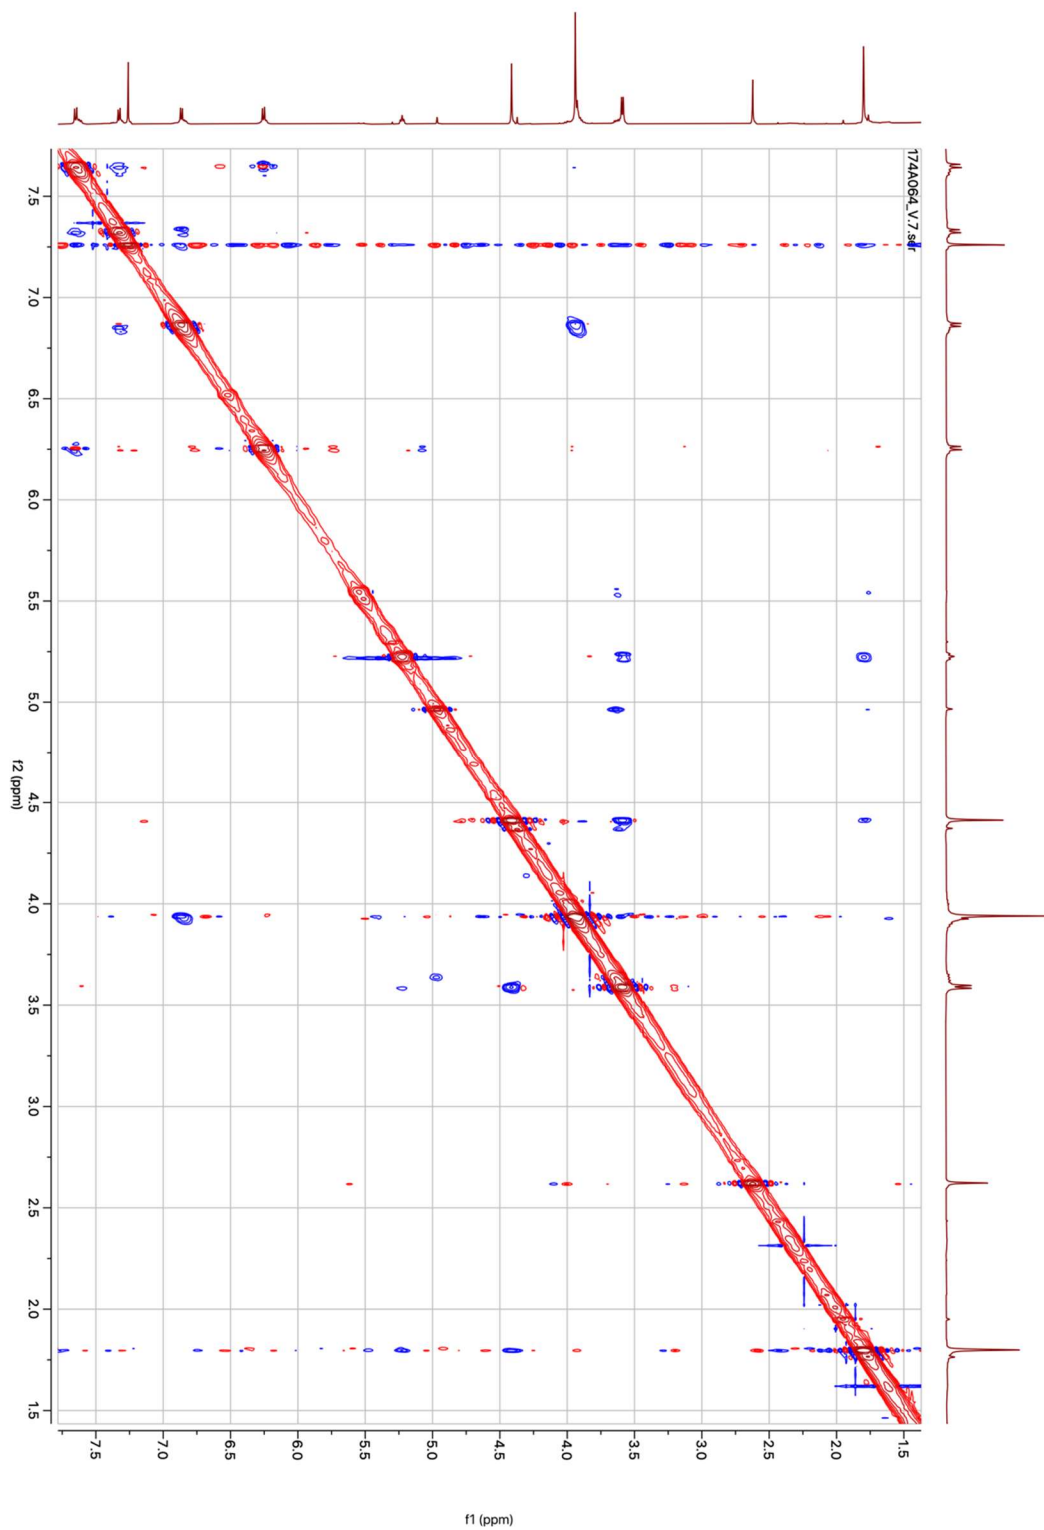

Fig. S7 2D NOESY spectrum of 4'-Hydroxyosthol (2)

## Qualitative Compound Report

|                               |                            |                      |                      |
|-------------------------------|----------------------------|----------------------|----------------------|
| <b>Data File</b>              | 174A064V_dil.d             | <b>Sample Name</b>   | 174A064V_dil         |
| <b>Sample Type</b>            | Sample                     | <b>Position</b>      | Vial 22              |
| <b>Instrument Name</b>        | Instrument 1               | <b>User Name</b>     | Heidi                |
| <b>Acq Method</b>             | SMaccms_DESI(+)_Centroid.m | <b>Acquired Time</b> | 2/13/2018 2:13:04 PM |
| <b>IRM Calibration Status</b> | Success                    | <b>DA Method</b>     | Default.m            |
| <b>Comment</b>                |                            |                      |                      |

|                     |      |                               |                                                          |
|---------------------|------|-------------------------------|----------------------------------------------------------|
| <b>Sample Group</b> |      | <b>Info.</b>                  |                                                          |
| <b>Stream Name</b>  | LC 1 | <b>Acquisition SW Version</b> | 6200 series TOF/6500 series<br>Q-TOF B.06.01 (B6172 SP1) |

### Compound Table

| Compound Label                            | RT   | Mass     | Formula    | MFG Formula | MFG Diff (ppm) | DB Formula |
|-------------------------------------------|------|----------|------------|-------------|----------------|------------|
| Cpd 5: C15 H16 O4;<br>283.09237 260.10420 | 4.93 | 260.1042 | C15 H16 O4 | C15 H16 O4  | 2.55           | C15 H16 O4 |

| Compound Label                            | m/z       | RT   | Algorithm                 | Mass     |
|-------------------------------------------|-----------|------|---------------------------|----------|
| Cpd 5: C15 H16 O4;<br>283.09237 260.10420 | 283.09237 | 4.93 | Find by Molecular Feature | 260.1042 |

### MFE MS Spectrum

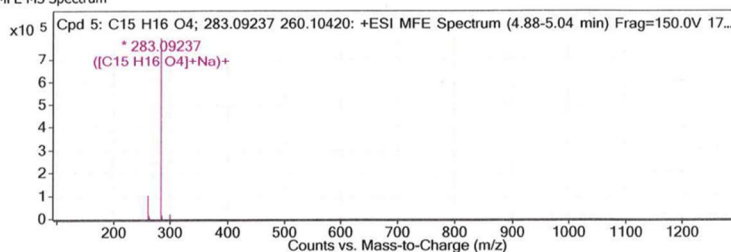

### MFE MS Zoomed Spectrum

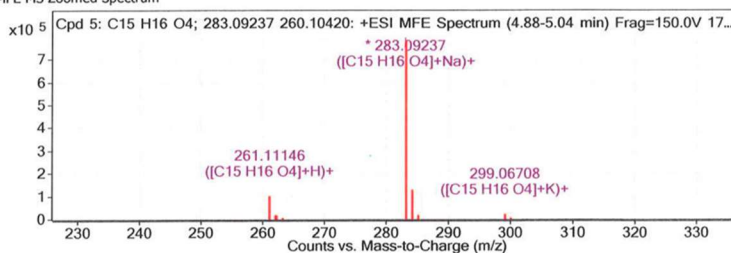

### MS Spectrum Peak List

| m/z       | z | Abund     | Formula    | Ion     |
|-----------|---|-----------|------------|---------|
| 261.11146 | 1 | 101057.21 | C15 H16 O4 | (M+H)+  |
| 262.11485 | 1 | 15771.74  | C15 H16 O4 | (M+H)+  |
| 263.11772 | 1 | 2098.45   | C15 H16 O4 | (M+H)+  |
| 283.09237 | 1 | 795776.88 | C15 H16 O4 | (M+Na)+ |
| 284.09707 | 1 | 113655.14 | C15 H16 O4 | (M+Na)+ |
| 285.09942 | 1 | 15181.58  | C15 H16 O4 | (M+Na)+ |

Fig. S8 HRESIMS spectrum of 4'-Hydroxyosthol (2)

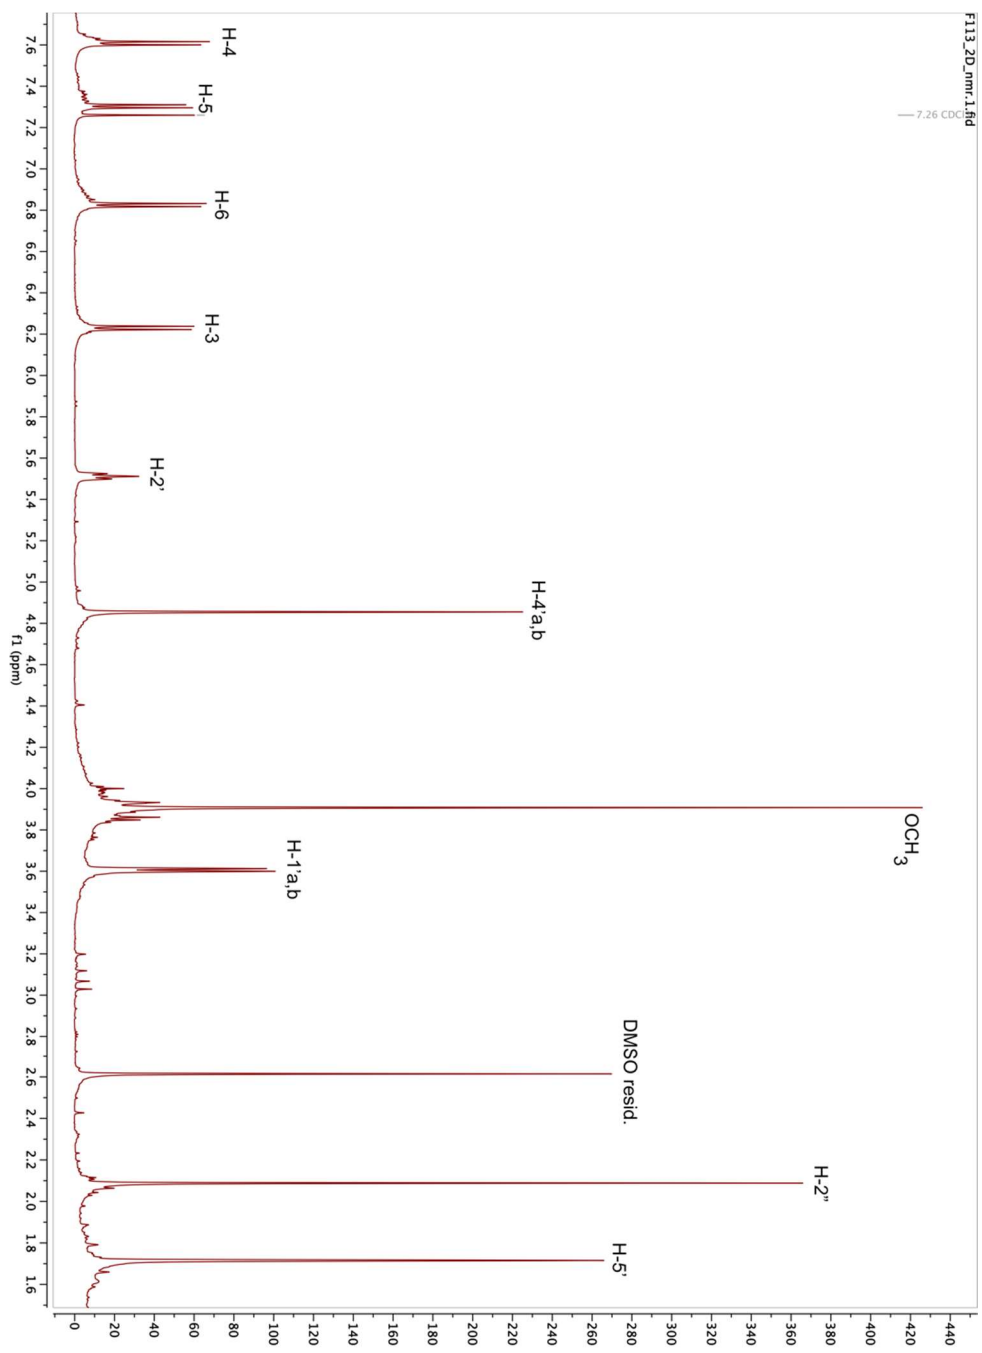

**Fig. S9**  $^1\text{H}$  NMR spectrum (600 MHz,  $\text{CDCl}_3$ ) of 4'-Acetoxysthol (3)

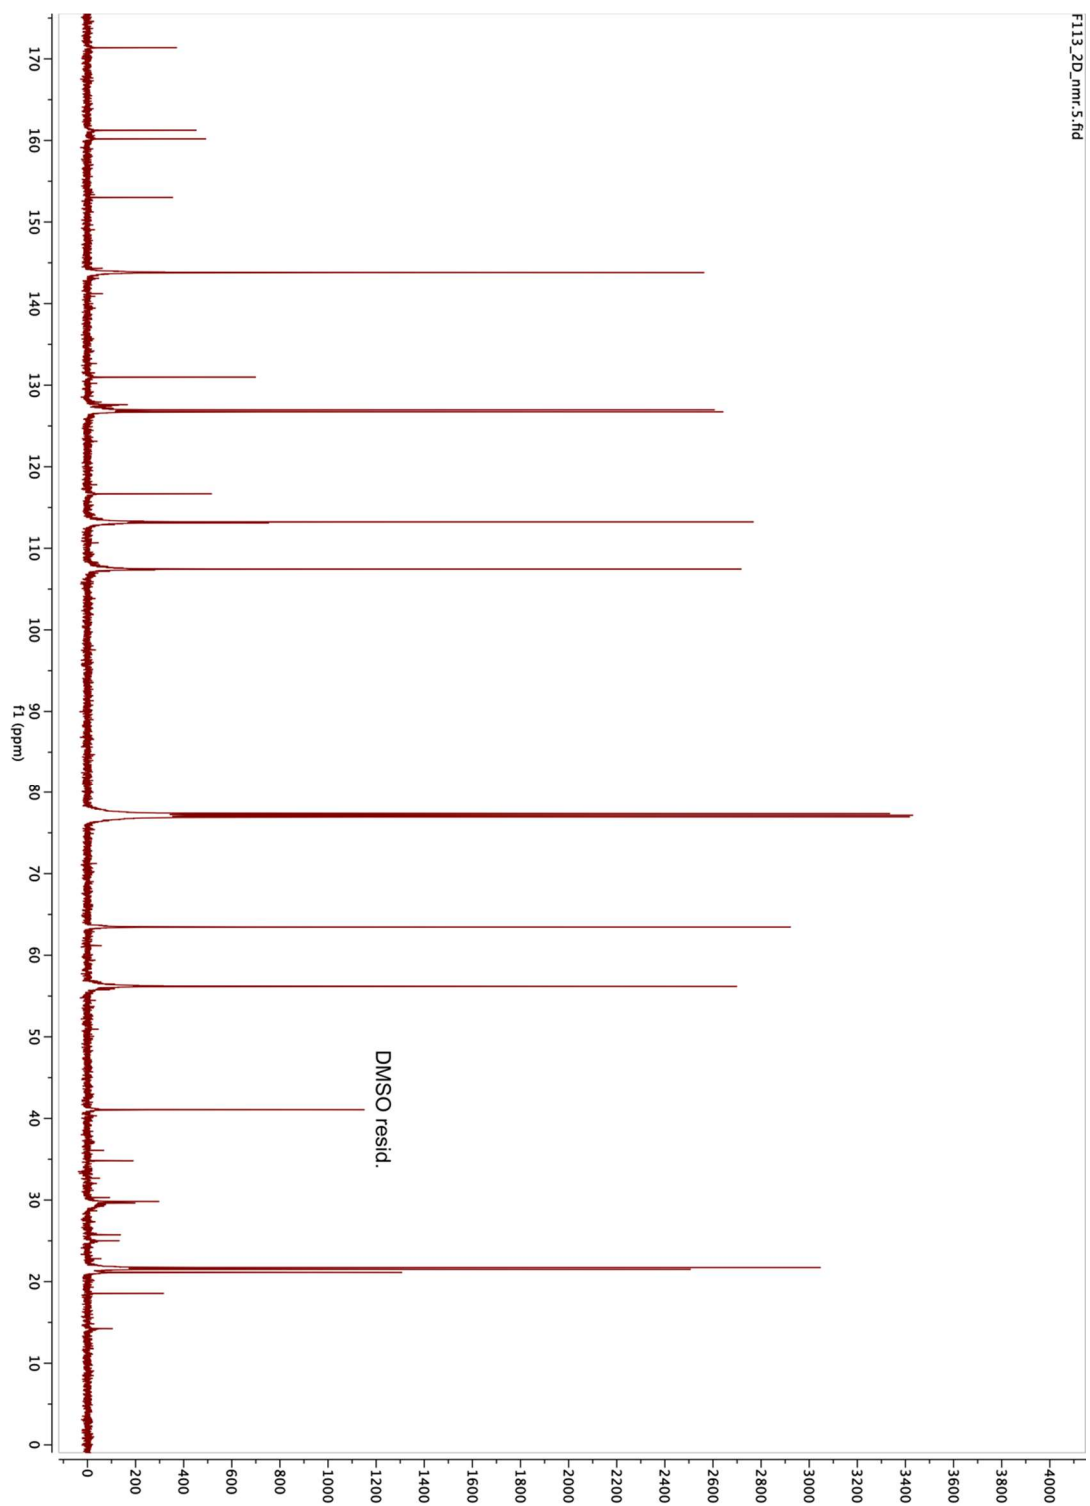

Fig. S10  $^{13}\text{C}$  NMR spectrum (125 MHz,  $\text{CDCl}_3$ ) of 4'-Acetoxysthol (3)

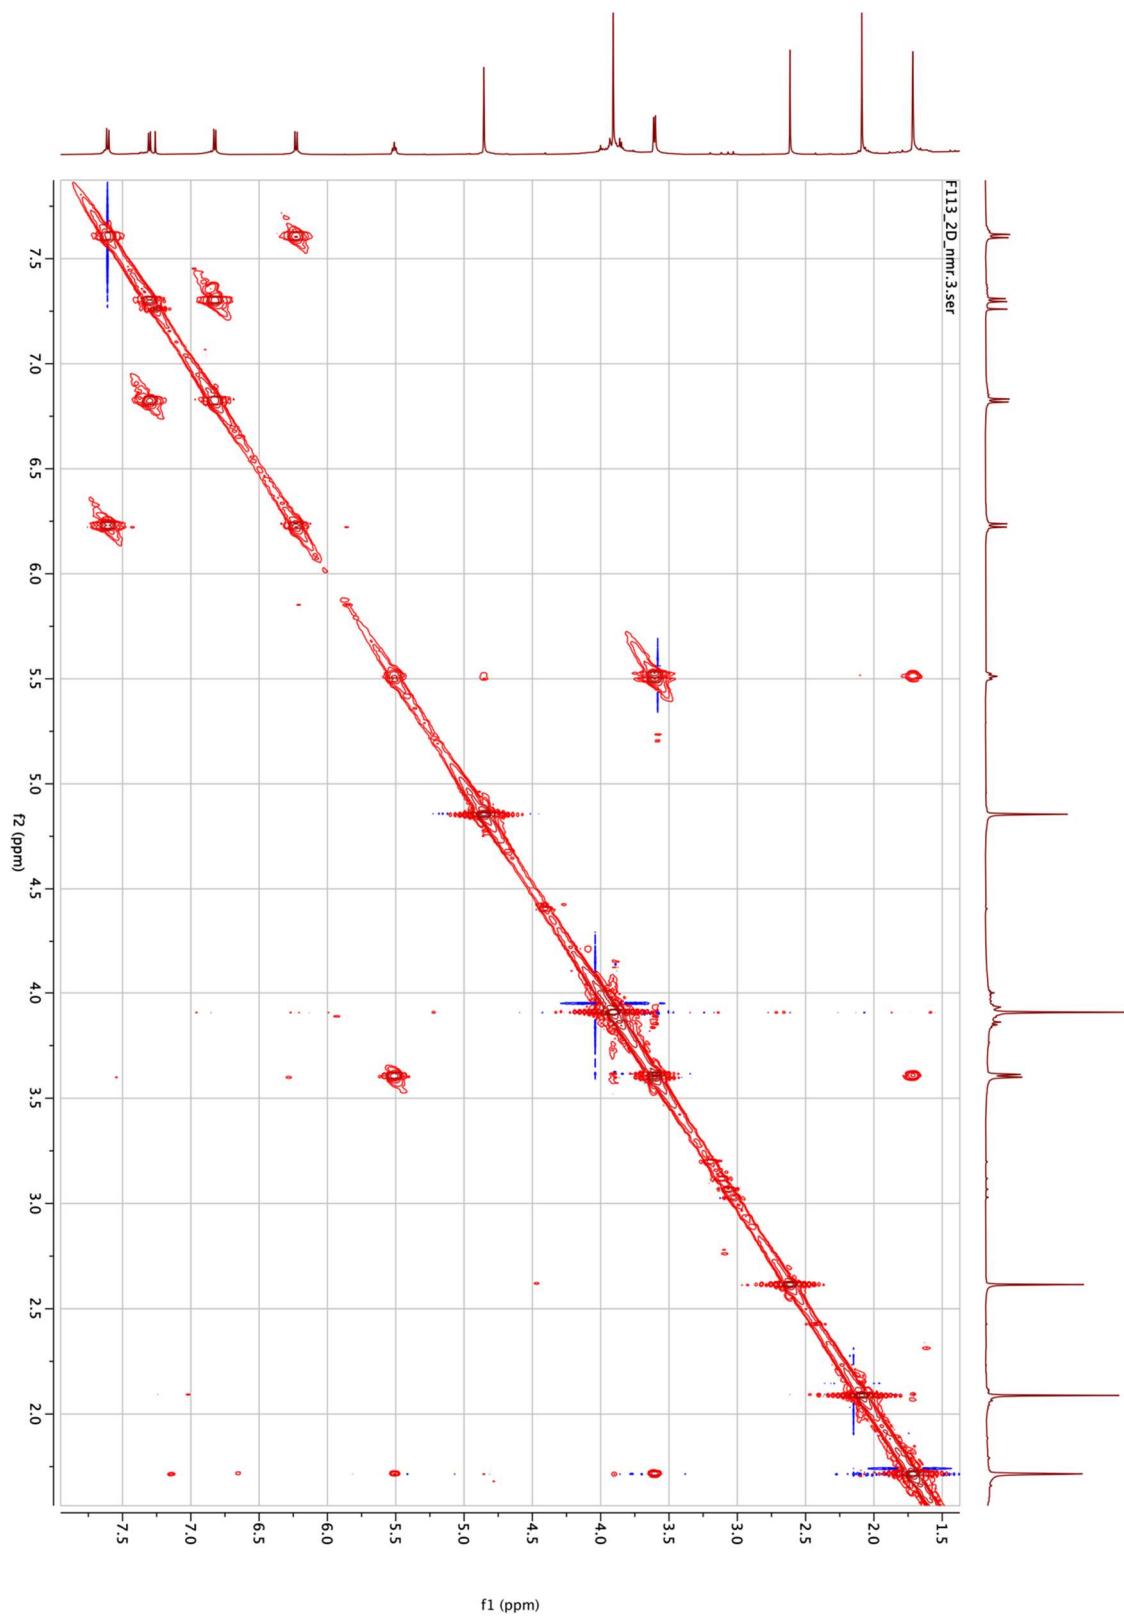

**Fig. S11** 2D COSY spectrum of 4'-Acetoxysthol (3)

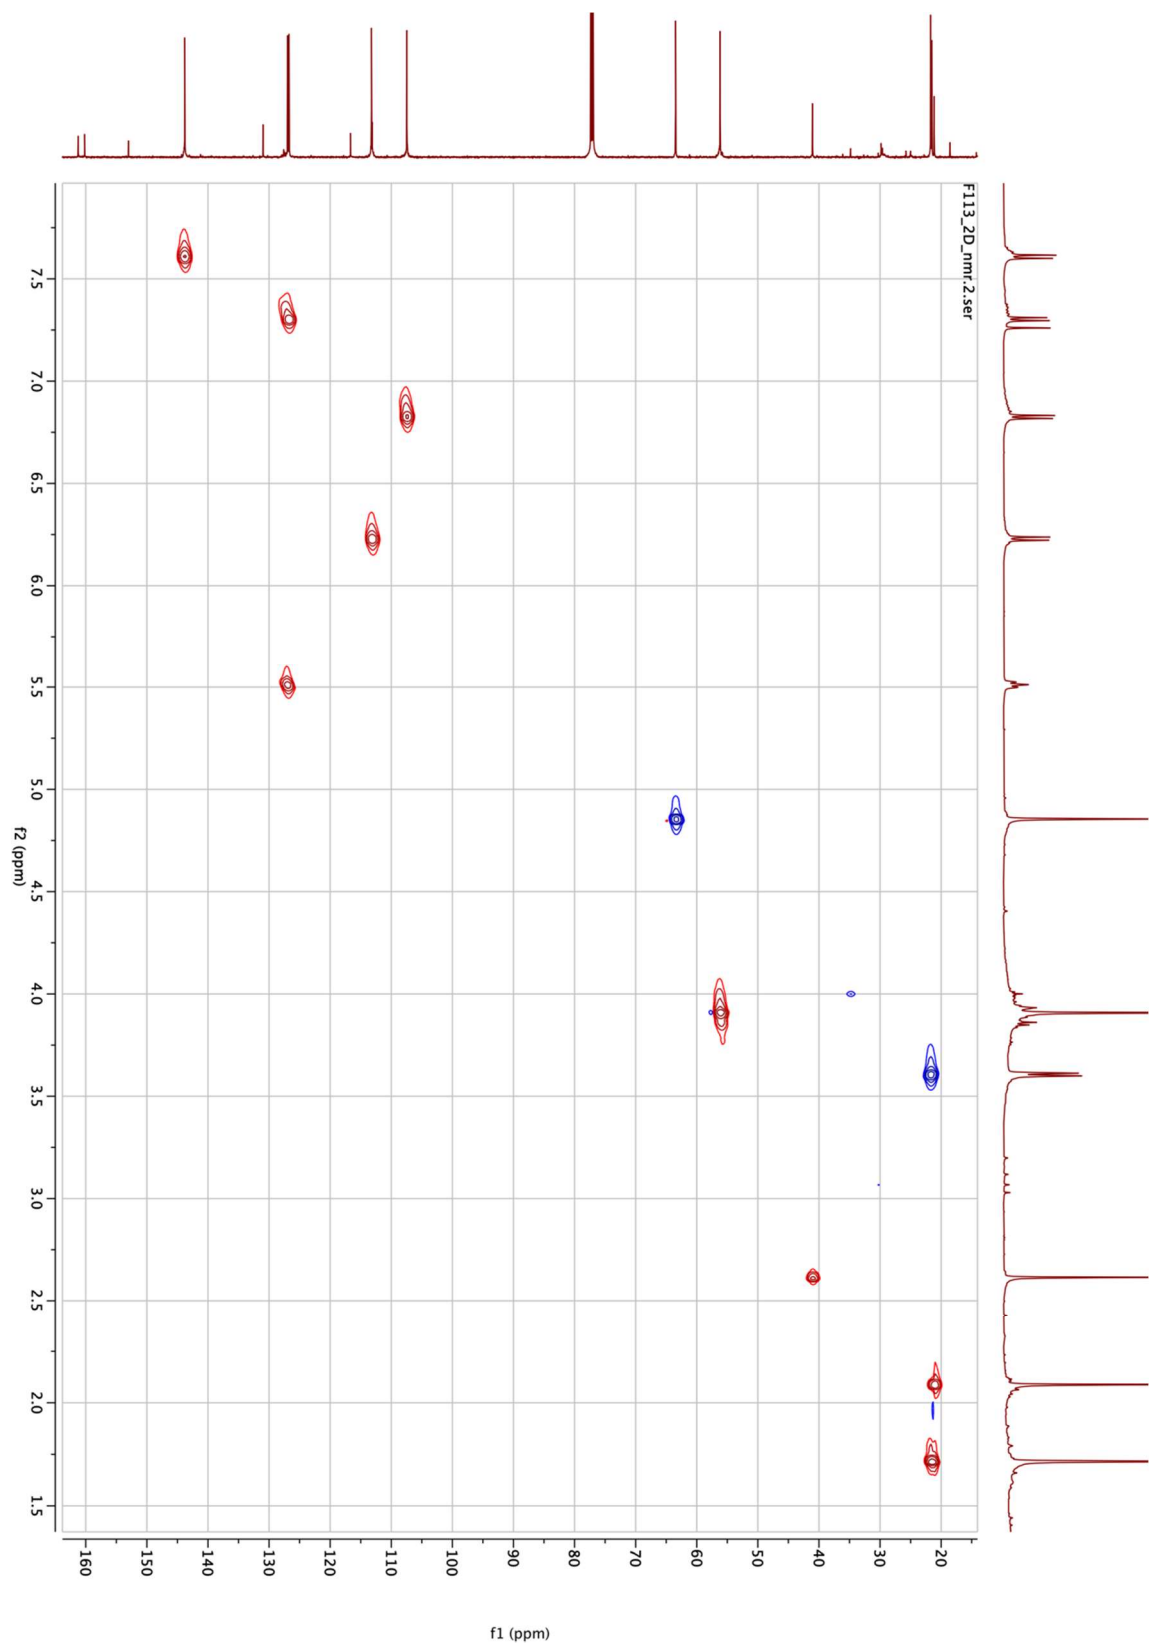

Fig. S12 2D HSQC spectrum 4'-Acetoxysthol (3)

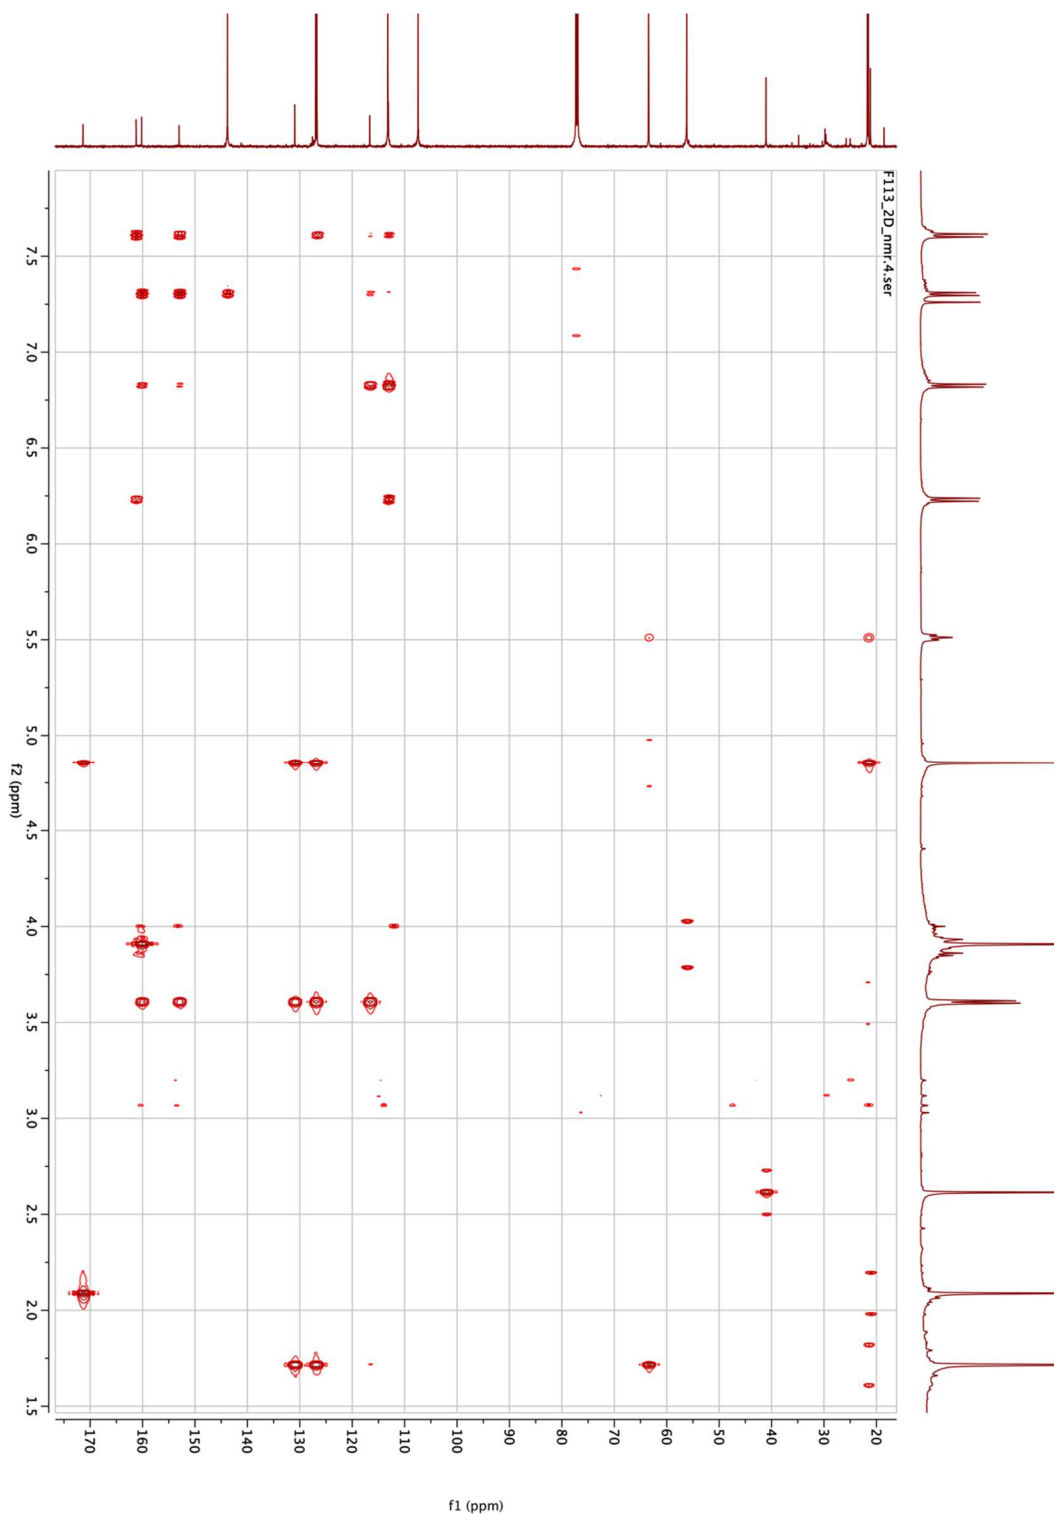

Fig. S13 2D HMBC spectrum of 4'-Acetoxysthol (3)

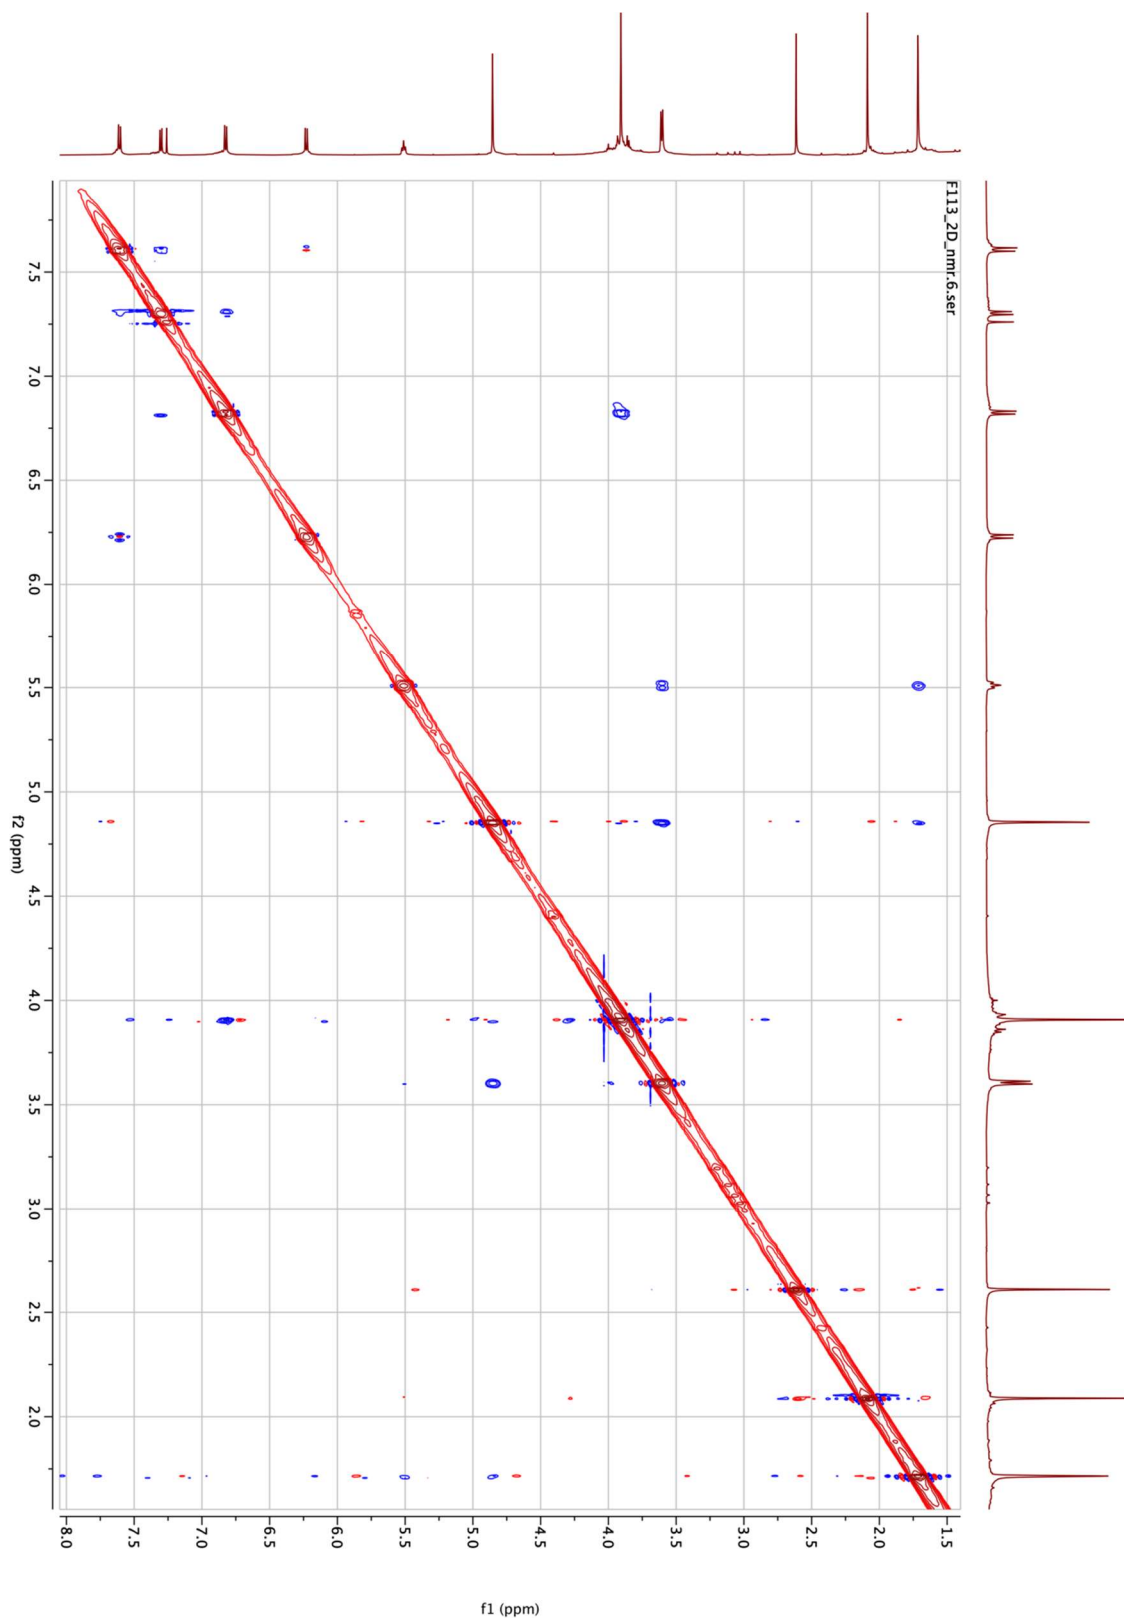

f1 (ppm)  
**Fig. S14** 2D NOESY spectrum of 4'-Acetoxysthol (3)



## Qualitative Compound Report

|                        |                            |               |                      |
|------------------------|----------------------------|---------------|----------------------|
| Data File              | 174A064Y_1000.d            | Sample Name   | 174A064Y_1000        |
| Sample Type            | Sample                     | Position      | Vial 21              |
| Instrument Name        | Instrument 1               | User Name     | Heidi                |
| Acq Method             | SMaccms_DESI(+)_Centroid.m | Acquired Time | 2/13/2018 4:36:20 PM |
| IRM Calibration Status | Success                    | DA Method     | Default.m            |
| Comment                |                            |               |                      |

|                     |      |                        |                                                       |
|---------------------|------|------------------------|-------------------------------------------------------|
| <b>Sample Group</b> |      | <b>Info.</b>           |                                                       |
| Stream Name         | LC 1 | Acquisition SW Version | 6200 series TOF/6500 series Q-TOF B.06.01 (B6172 SP1) |

### Compound Table

| Compound Label                            | RT   | Mass      | Formula    | MFG Formula | MFG Diff (ppm) | DB Formula |
|-------------------------------------------|------|-----------|------------|-------------|----------------|------------|
| Cpd 2: C17 H18 O5;<br>325.10388 302.11467 | 5.63 | 302.11467 | C17 H18 O5 | C17 H18 O5  | 2.48           | C17 H18 O5 |

| Compound Label                            | m/z       | RT   | Algorithm                 | Mass      |
|-------------------------------------------|-----------|------|---------------------------|-----------|
| Cpd 2: C17 H18 O5;<br>325.10388 302.11467 | 325.10388 | 5.63 | Find by Molecular Feature | 302.11467 |

### MFE MS Spectrum

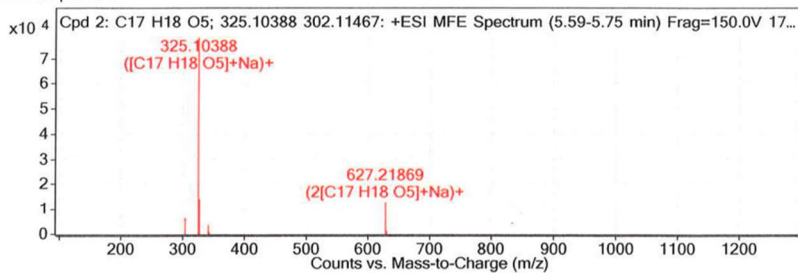

### MFE MS Zoomed Spectrum

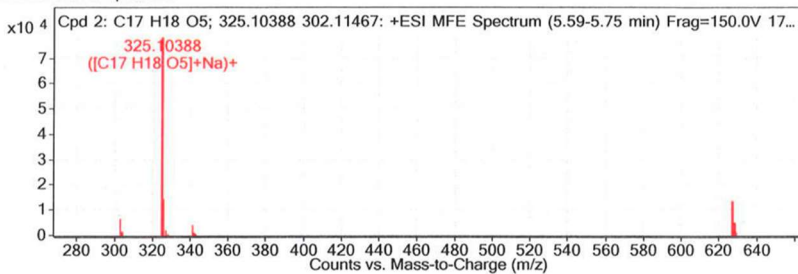

### MS Spectrum Peak List

| m/z       | z | Abund    | Formula    | Ion     |
|-----------|---|----------|------------|---------|
| 303.12244 | 1 | 6281.4   | C17 H18 O5 | (M+H)+  |
| 304.12499 | 1 | 1372.62  | C17 H18 O5 | (M+H)+  |
| 325.10388 | 1 | 78310.41 | C17 H18 O5 | (M+Na)+ |
| 326.10739 | 1 | 14248.89 | C17 H18 O5 | (M+Na)+ |
| 327.11008 | 1 | 2089.23  | C17 H18 O5 | (M+Na)+ |
| 341.07719 | 1 | 3814.93  | C17 H18 O5 | (M+K)+  |

Fig. S15 HRESIMS spectrum of 4'-Acetoxysthol (3)

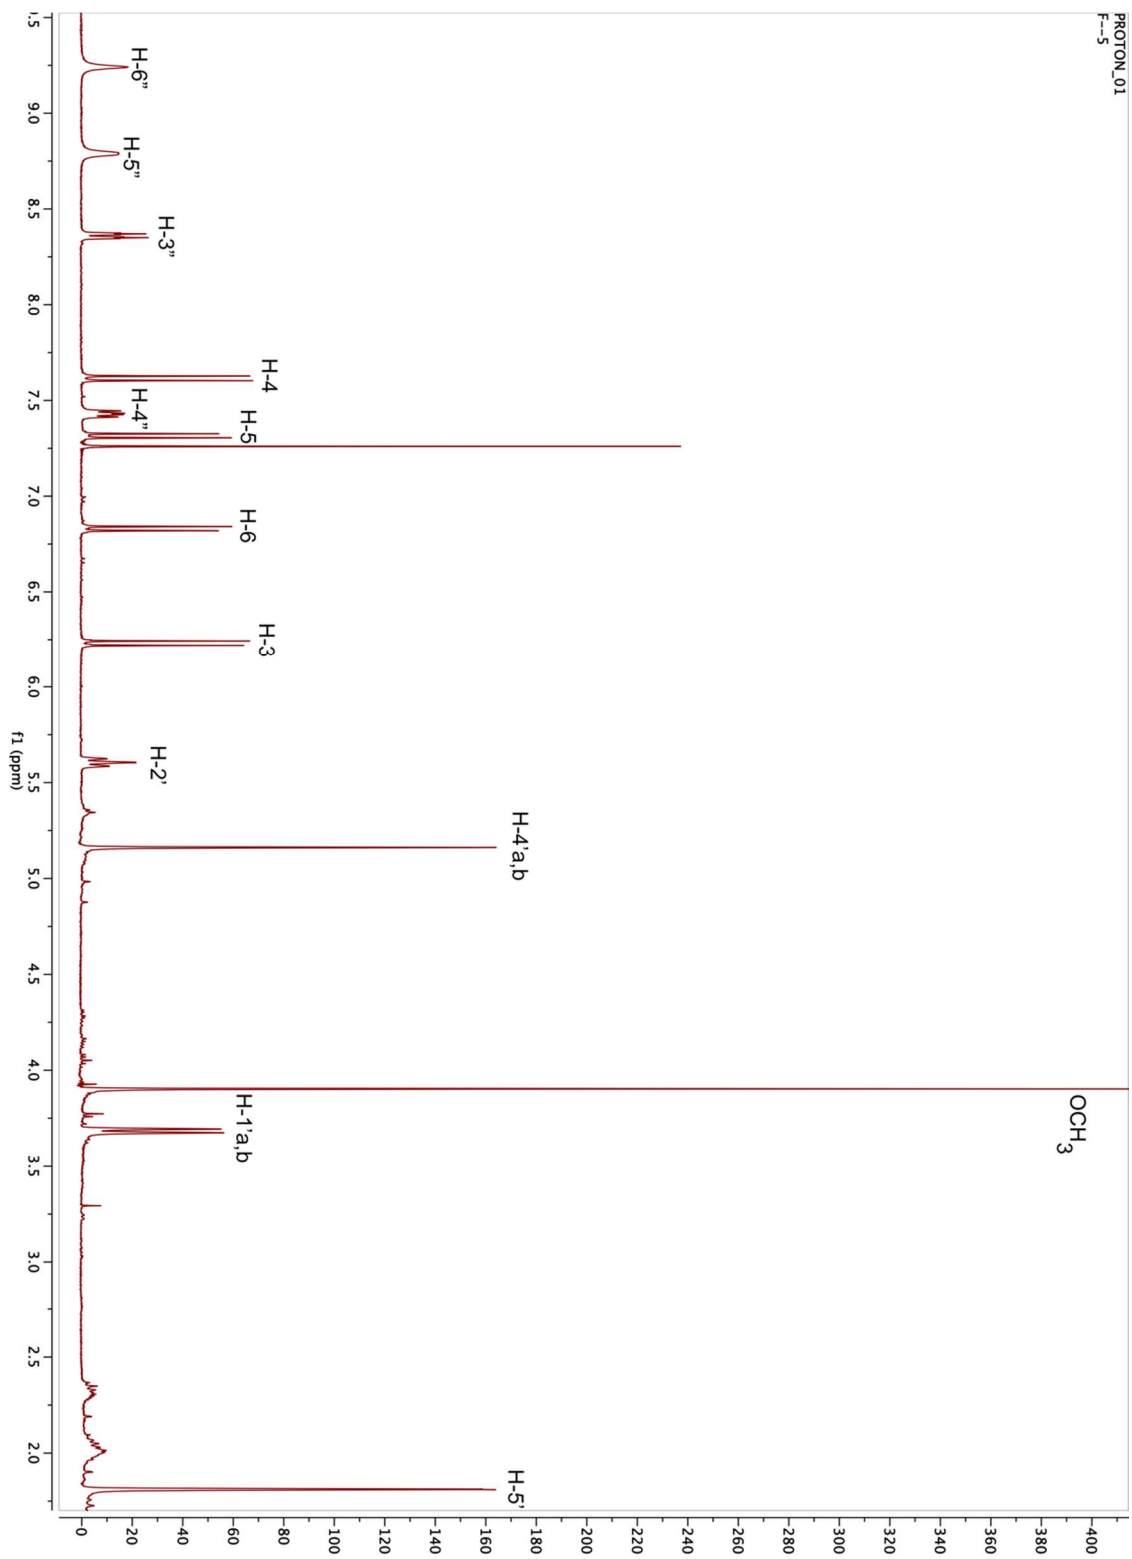

**Fig. S16** <sup>1</sup>H NMR spectrum (600 MHz, CDCl<sub>3</sub>) of Neopapillarine (**4**)

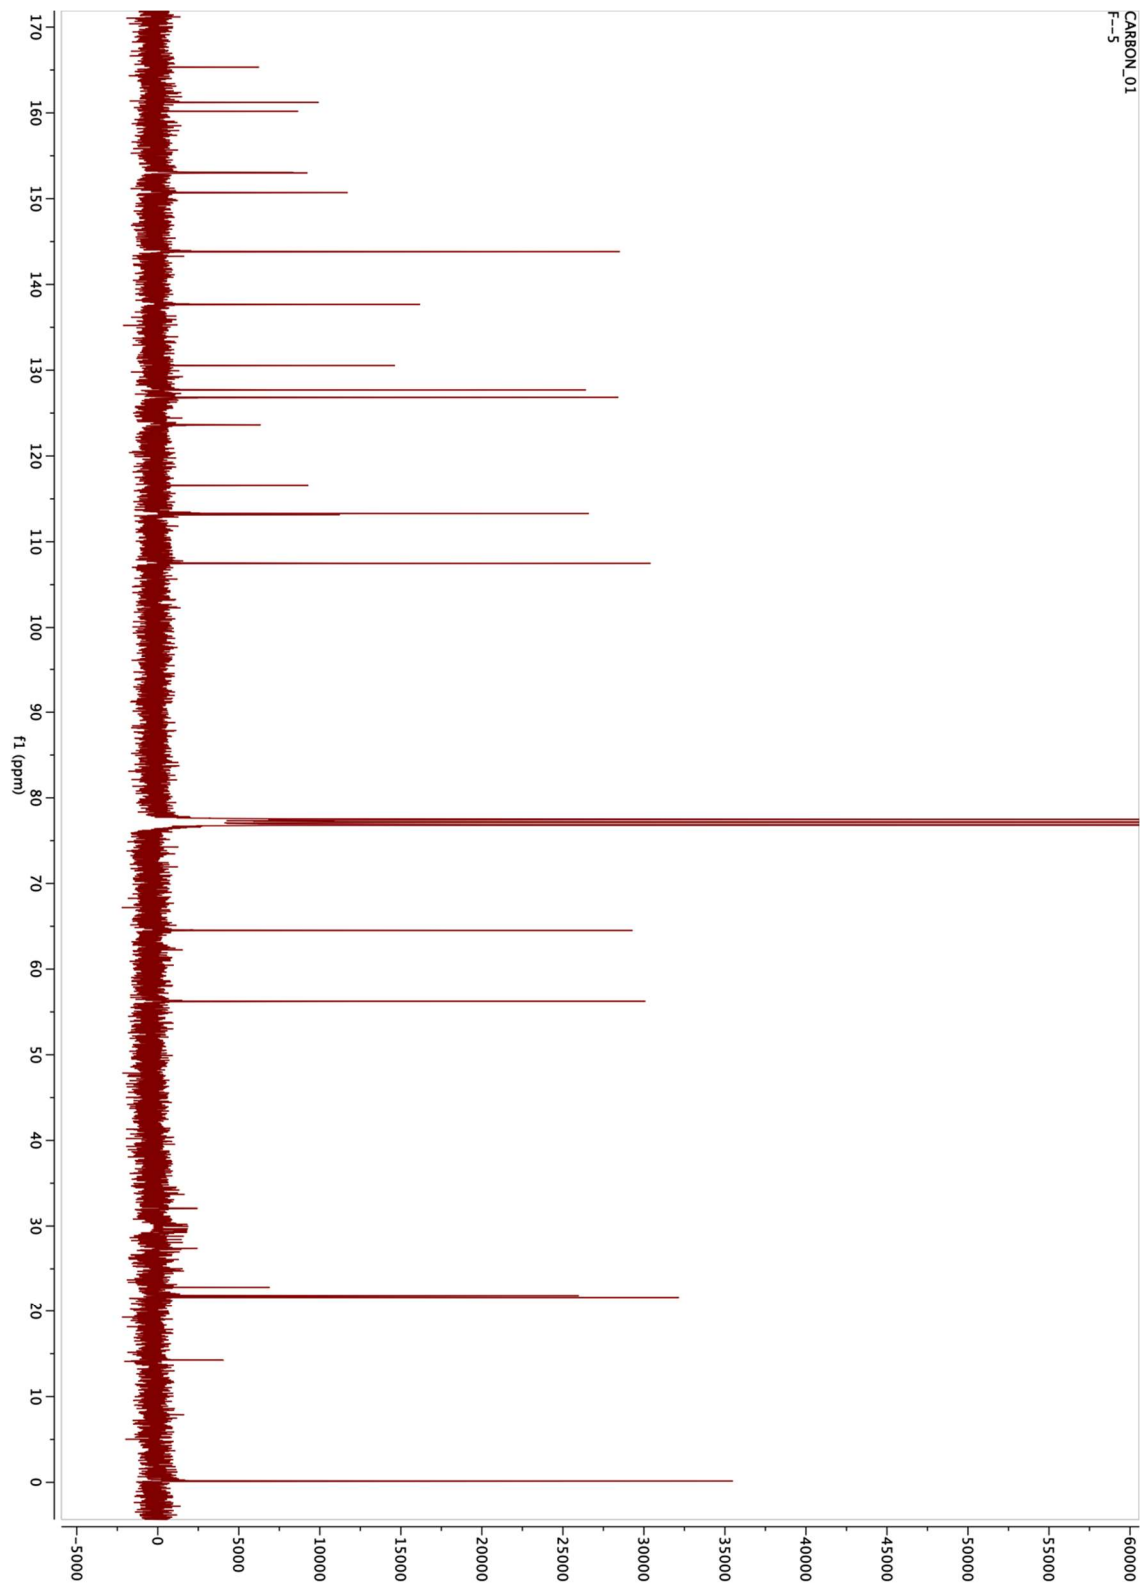

Fig. S17  $^{13}\text{C}$  NMR spectrum (125 MHz,  $\text{CDCl}_3$ ) of Neopapillarine (4)

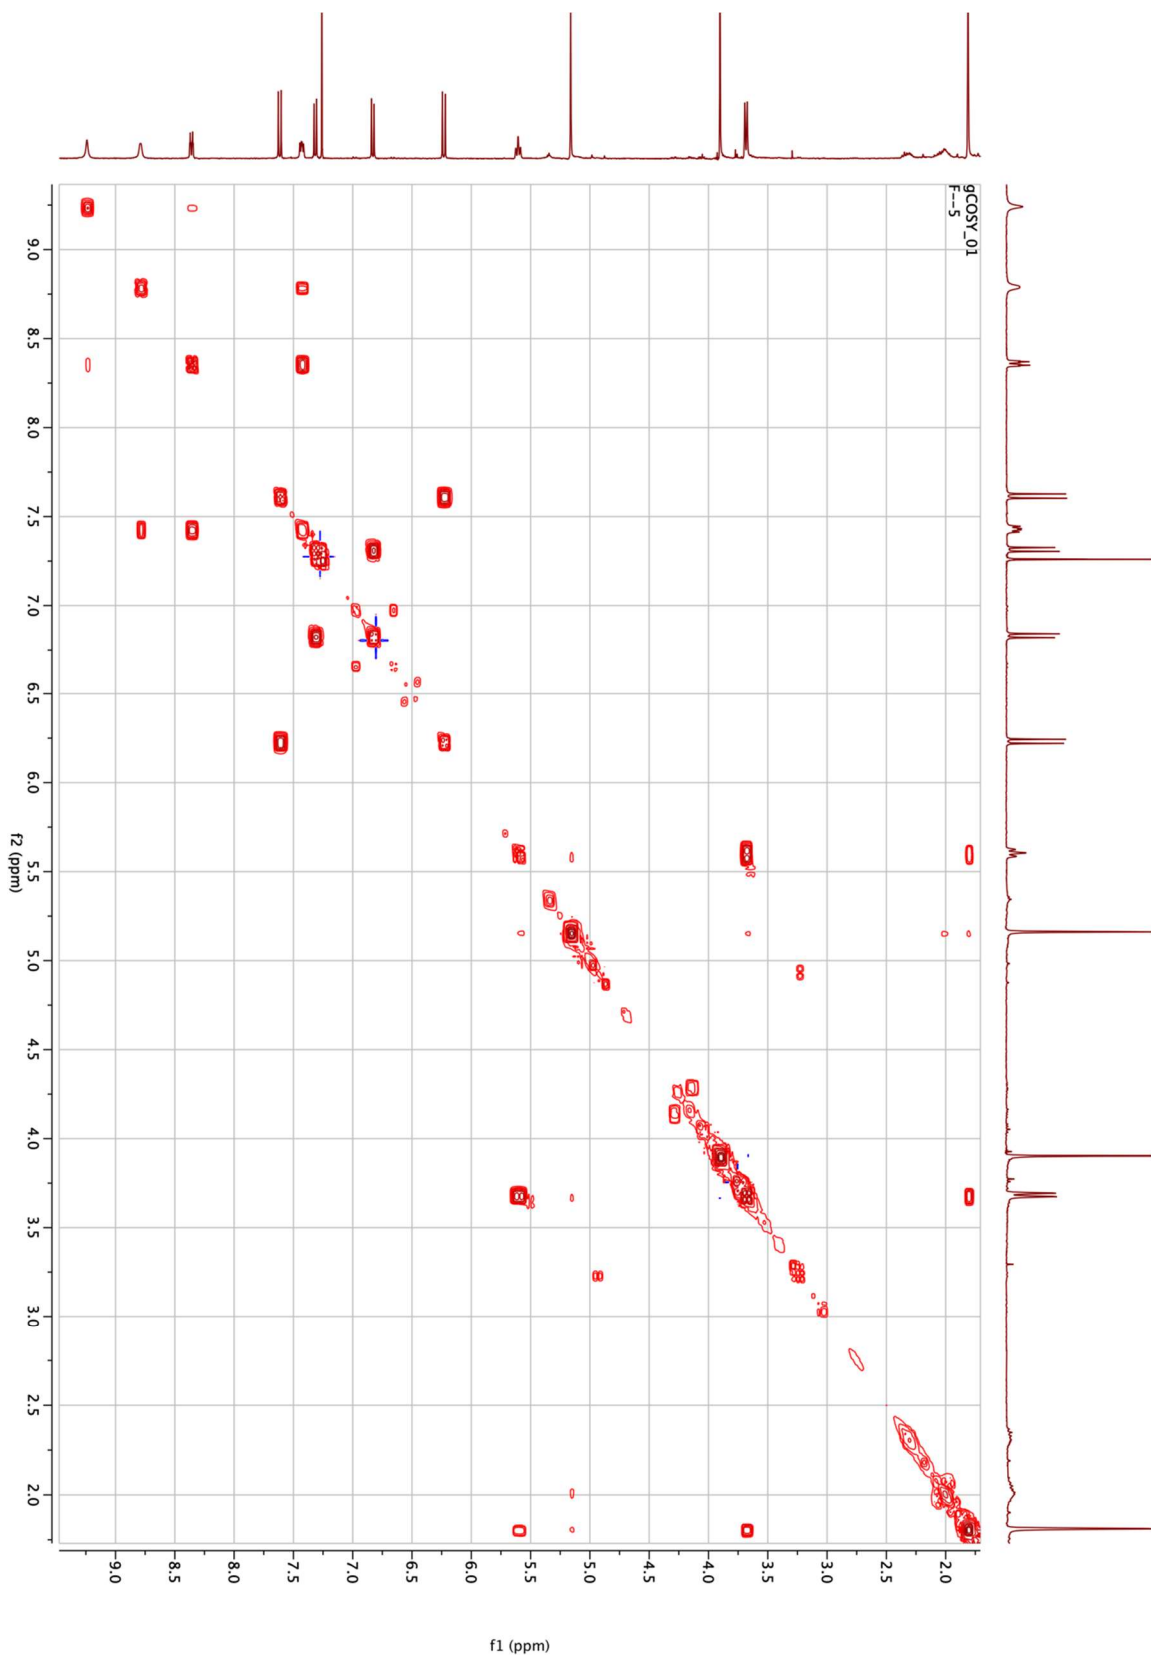

Fig. S18 2D COSY spectrum of Neopapillarine (4)

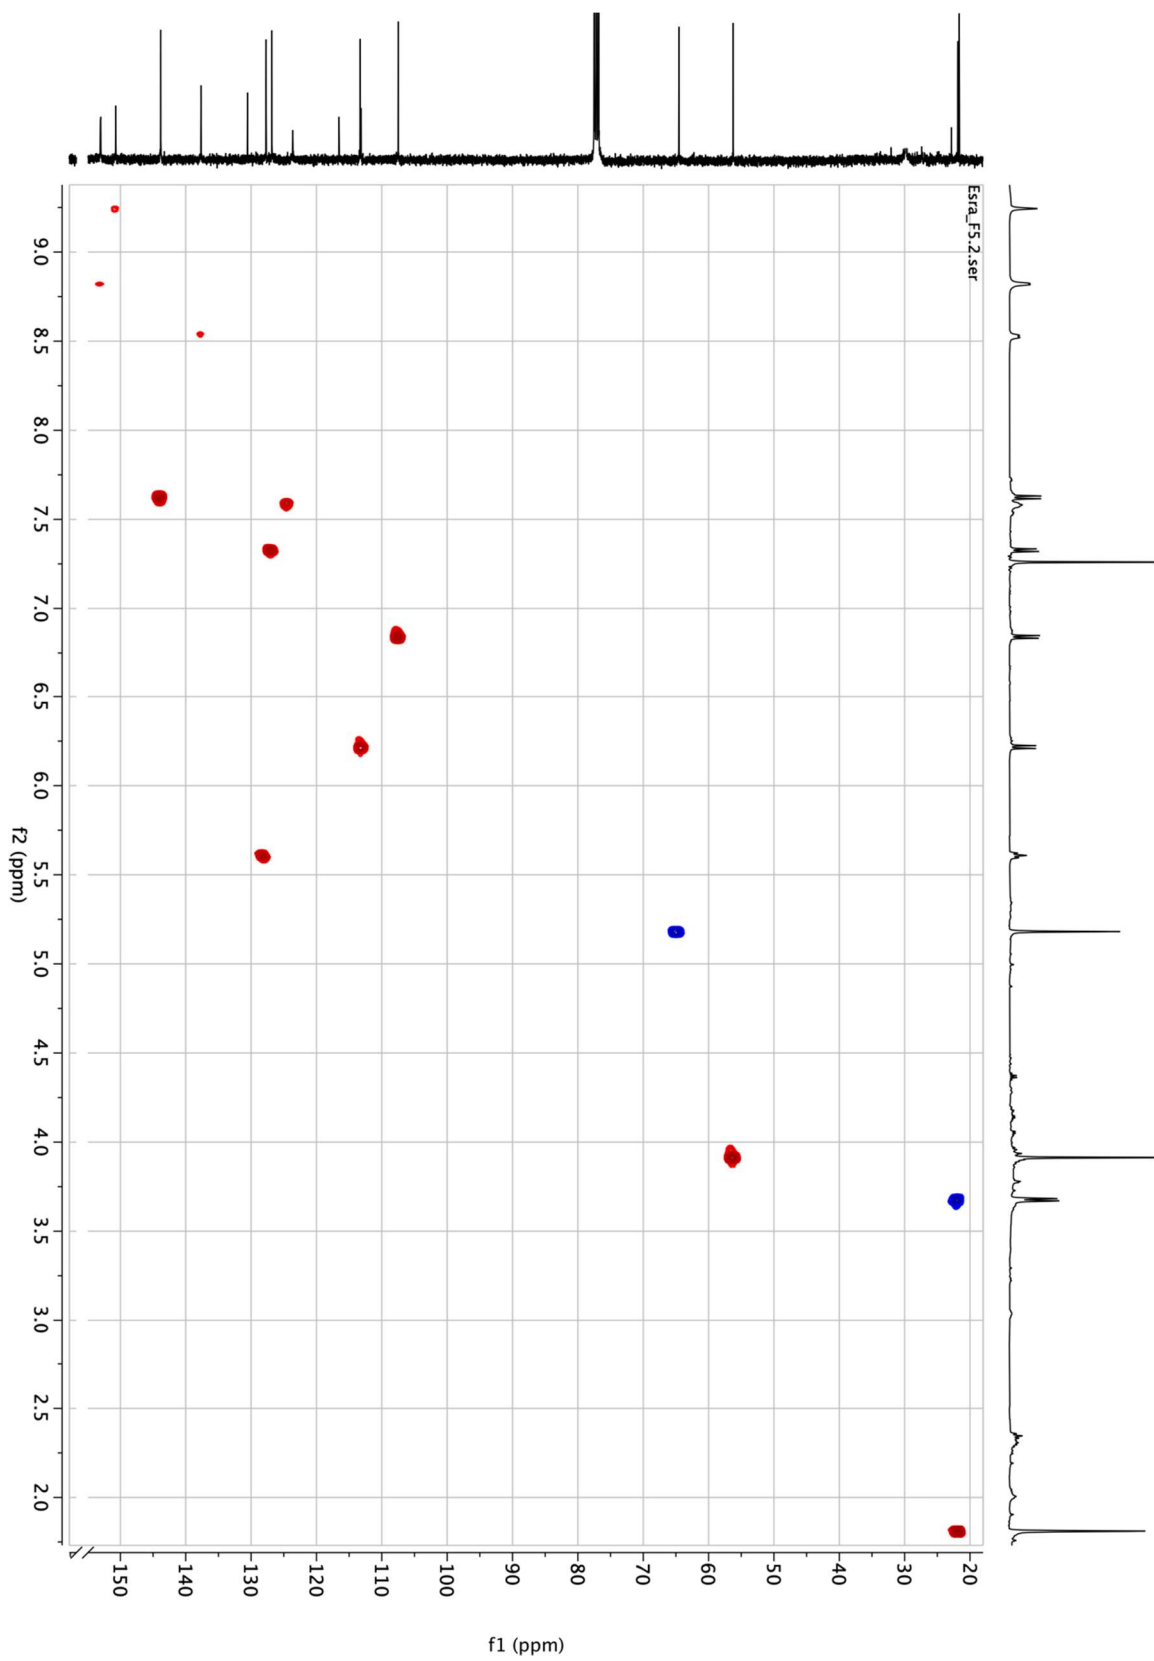

Fig. S19 2D HSQC spectrum Neopapillarine (4)

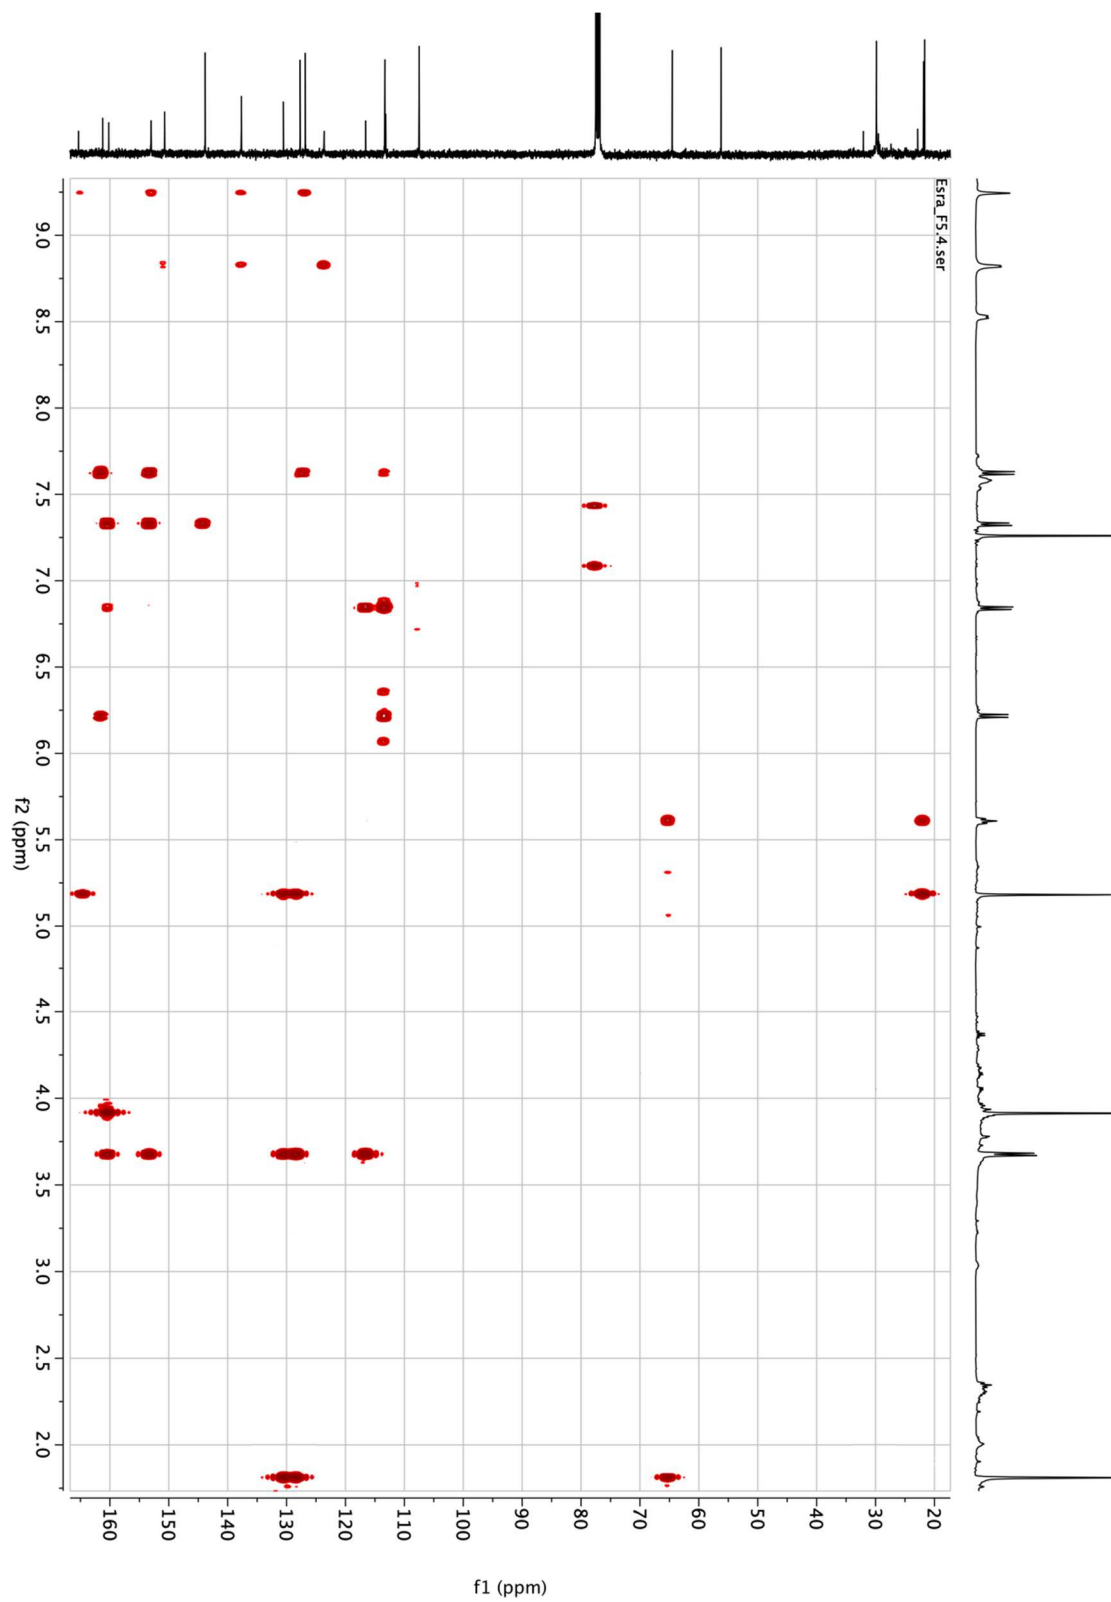

Fig. S20 2D HMBC spectrum of Neopapillarine (4)

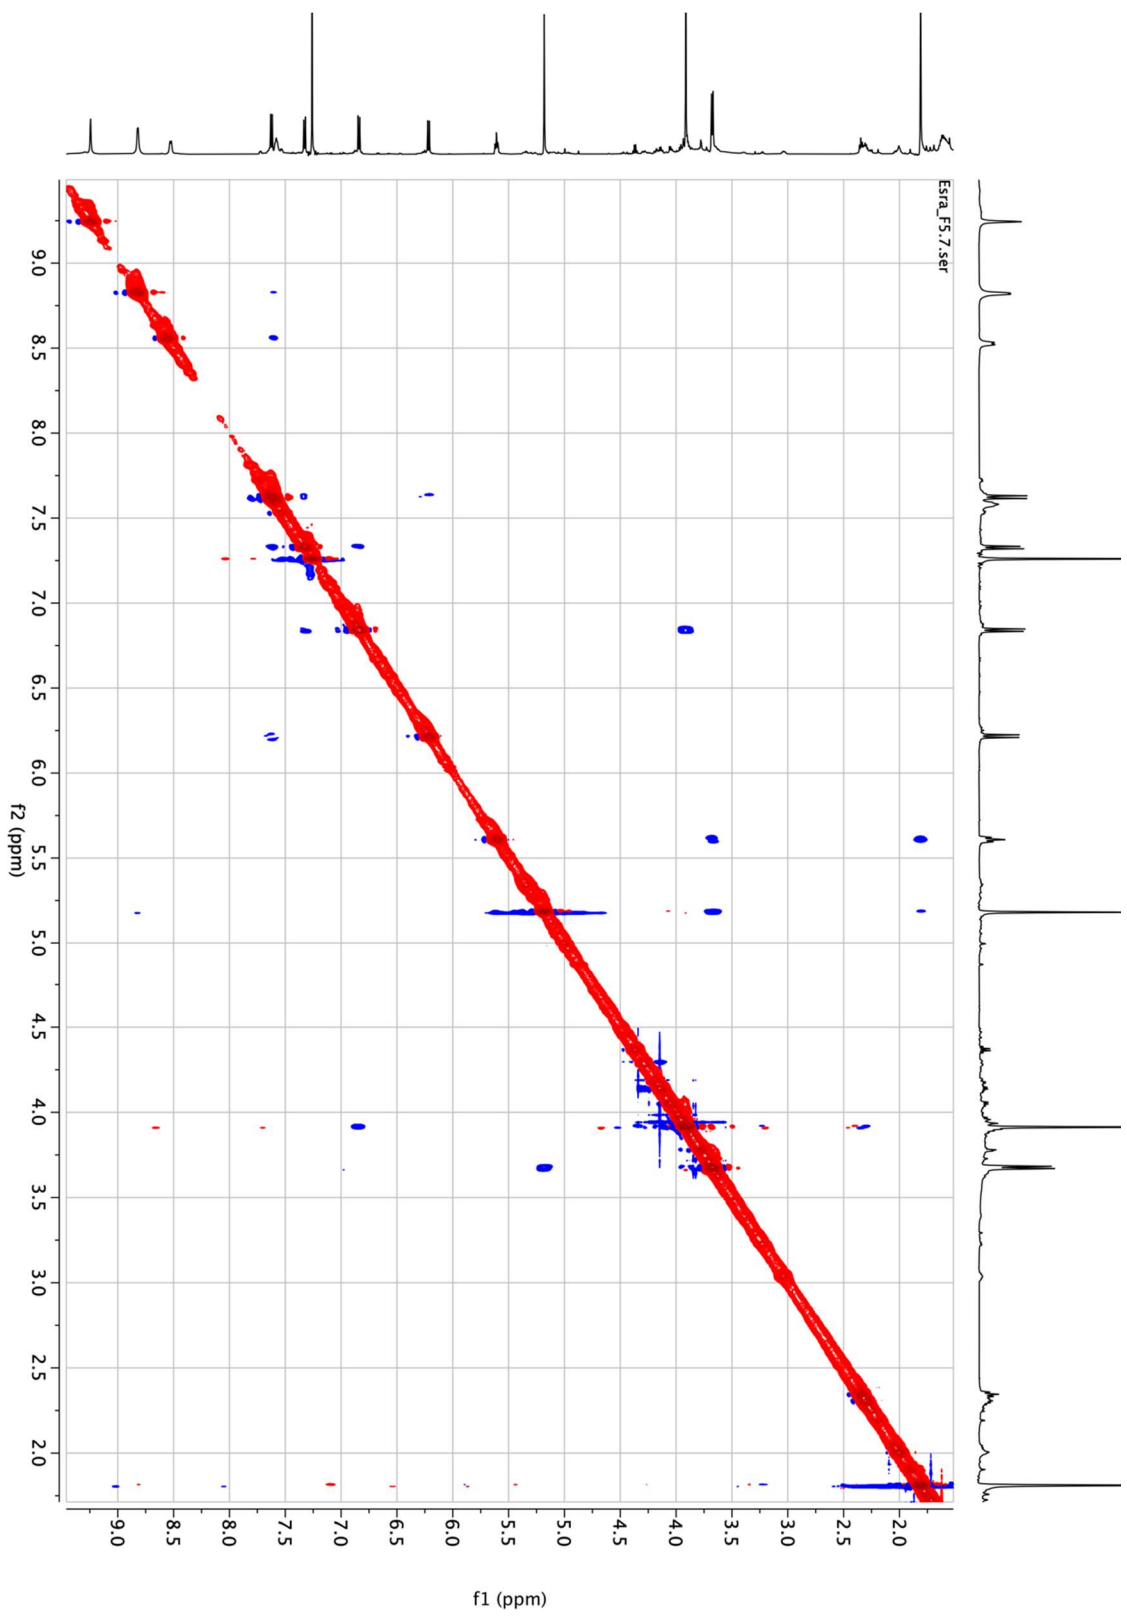

Fig. S21 2D NOESY spectrum of Neopapillarine (4)

## Qualitative Analysis Report

|                               |                             |                      |                       |
|-------------------------------|-----------------------------|----------------------|-----------------------|
| <b>Data Filename</b>          | QT01191604.d                | <b>Sample Name</b>   | 101I069B              |
| <b>Sample Type</b>            | Sample                      | <b>Position</b>      | Vial 2                |
| <b>Instrument Name</b>        | Instrument 1                | <b>User Name</b>     |                       |
| <b>Acq Method</b>             | SMaccms_DESI(+)_Centroid.m  | <b>Acquired Time</b> | 2/13/2018 10:20:10 AM |
| <b>IRM Calibration Status</b> | [REDACTED]                  | <b>DA Method</b>     | Default.m             |
| <b>Comment</b>                |                             |                      |                       |
| <b>Sample Group</b>           | <b>Info.</b>                |                      |                       |
| <b>Acquisition SW</b>         | 6200 series TOF/6500 series |                      |                       |
| <b>Version</b>                | Q-TOF B.05.01 (B5125.1)     |                      |                       |

### User Chromatograms

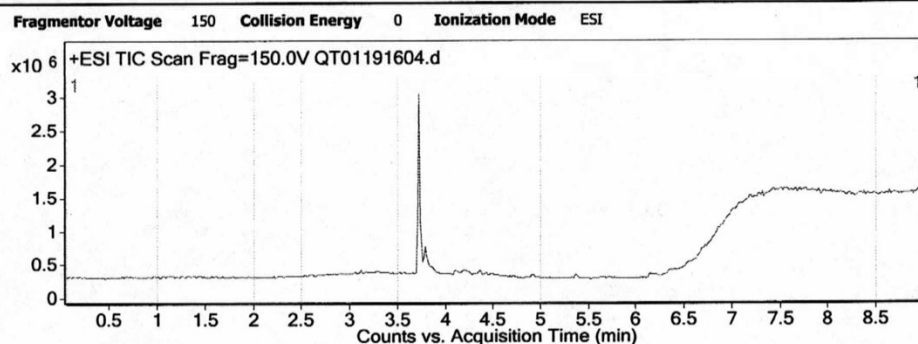

### User Spectra

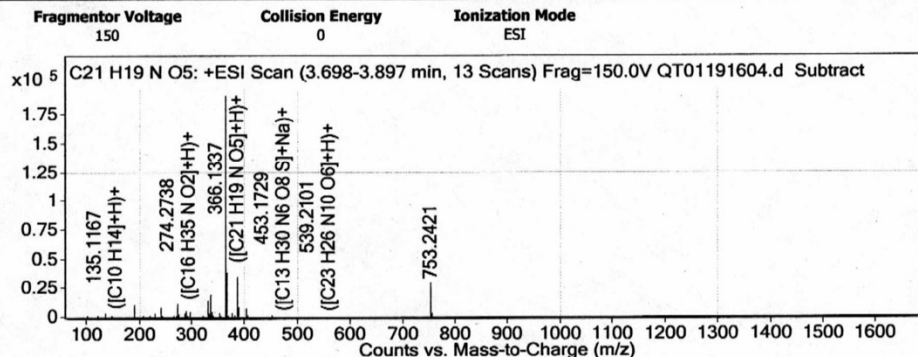

#### Peak List

| <i>m/z</i> | <i>z</i> | Abund     | Formula      | Ion     |
|------------|----------|-----------|--------------|---------|
| 191.1791   | 1        | 10605.98  | C14 H22      | (M+H)+  |
| 243.1013   | 1        | 7964.63   | C15 H14 O3   | (M+H)+  |
| 274.2738   | 1        | 10791.12  | C16 H35 N O2 | (M+H)+  |
| 332.2794   | 1        | 14030.35  | C17 H35 N5   | (M+Na)+ |
| 337.2347   | 1        | 18891.51  | C18 H34 O4   | (M+Na)+ |
| 366.1337   | 1        | 190952.17 | C21 H19 N O5 | (M+H)+  |
| 367.1367   | 1        | 38951.67  | C21 H19 N O5 | (M+H)+  |
| 388.1153   | 1        | 33976.99  | C21 H19 N O5 | (M+Na)+ |

Fig. S22 HRESIMS spectrum of Neopillarine (4)



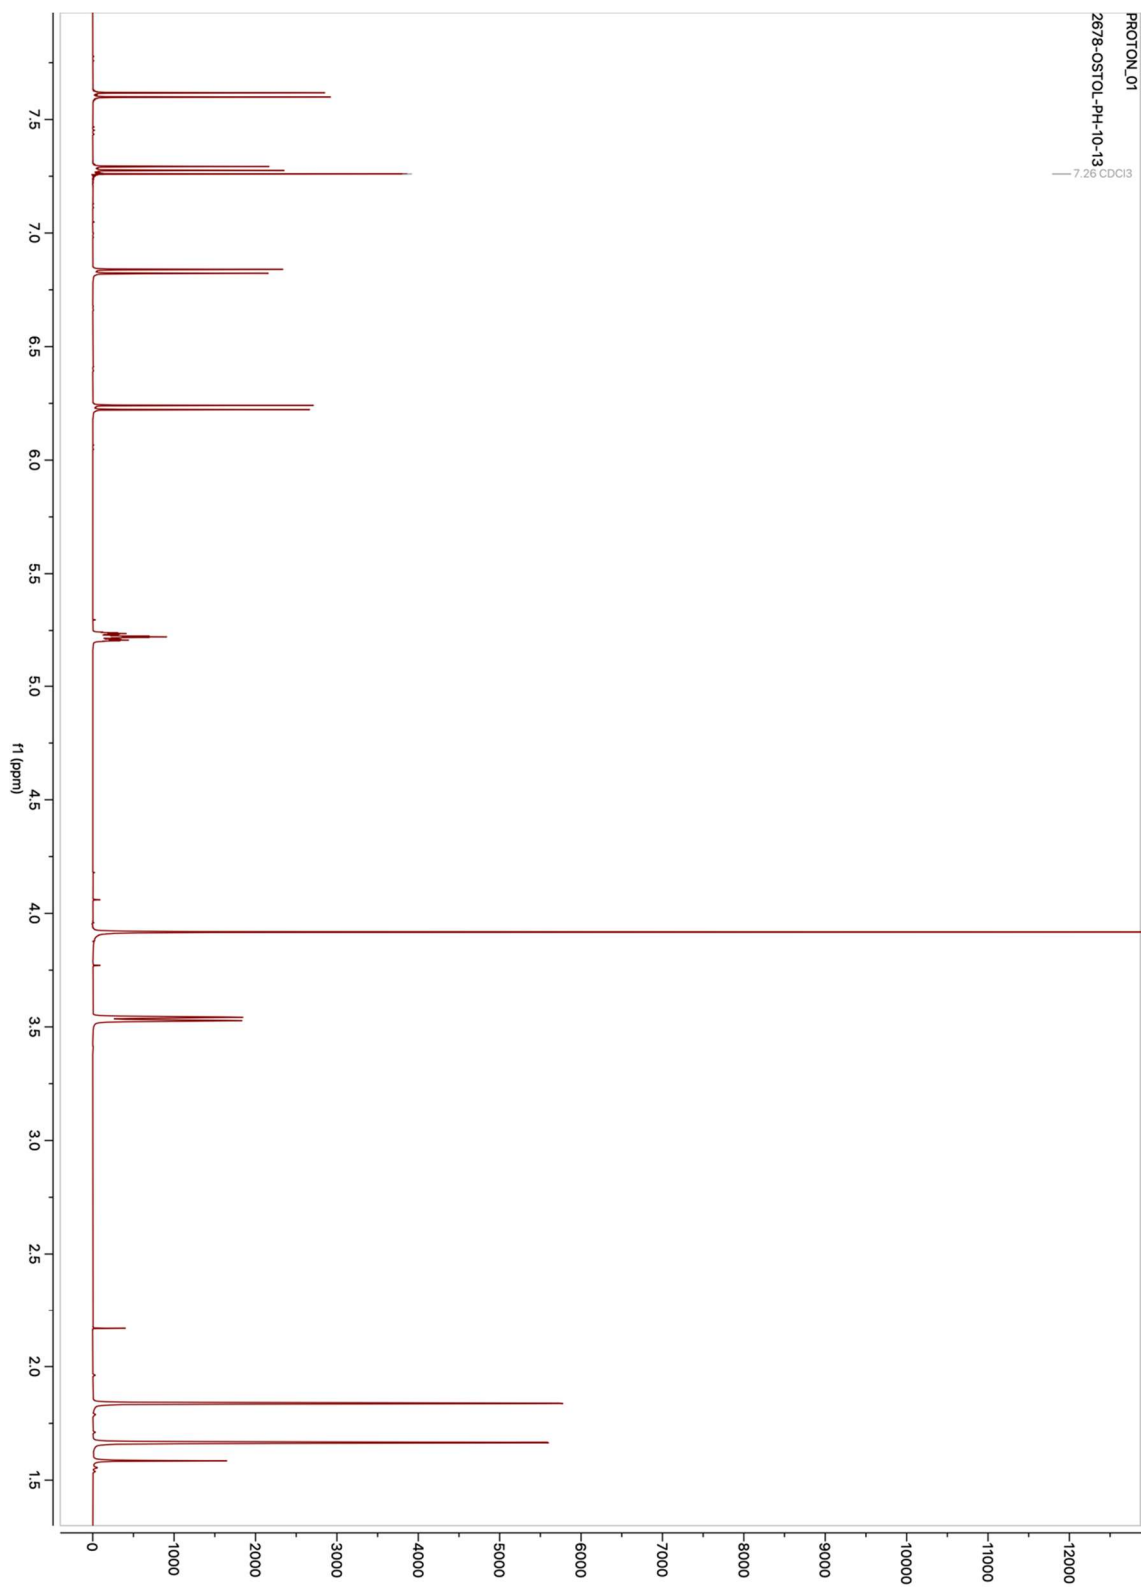

Fig. S23 <sup>1</sup>H NMR spectrum of Osthol (1)

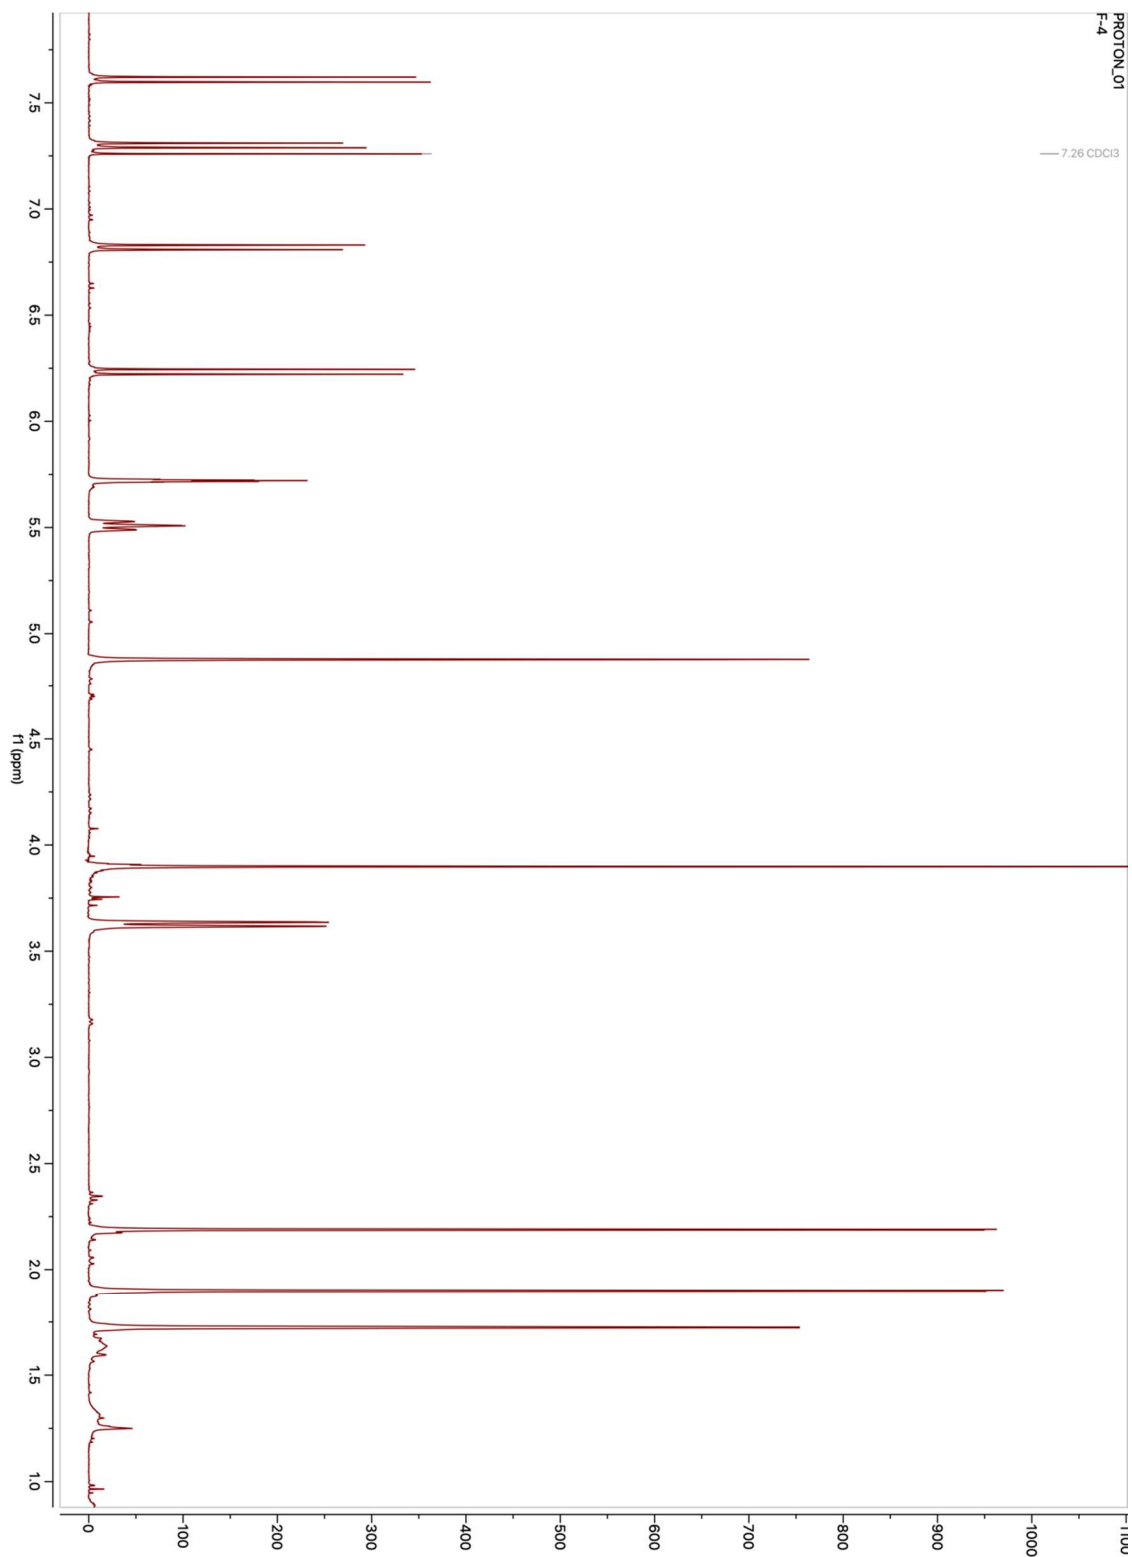

Fig. S24  $^1\text{H}$  NMR spectrum of 4'-Seneciolyxosthol (5)

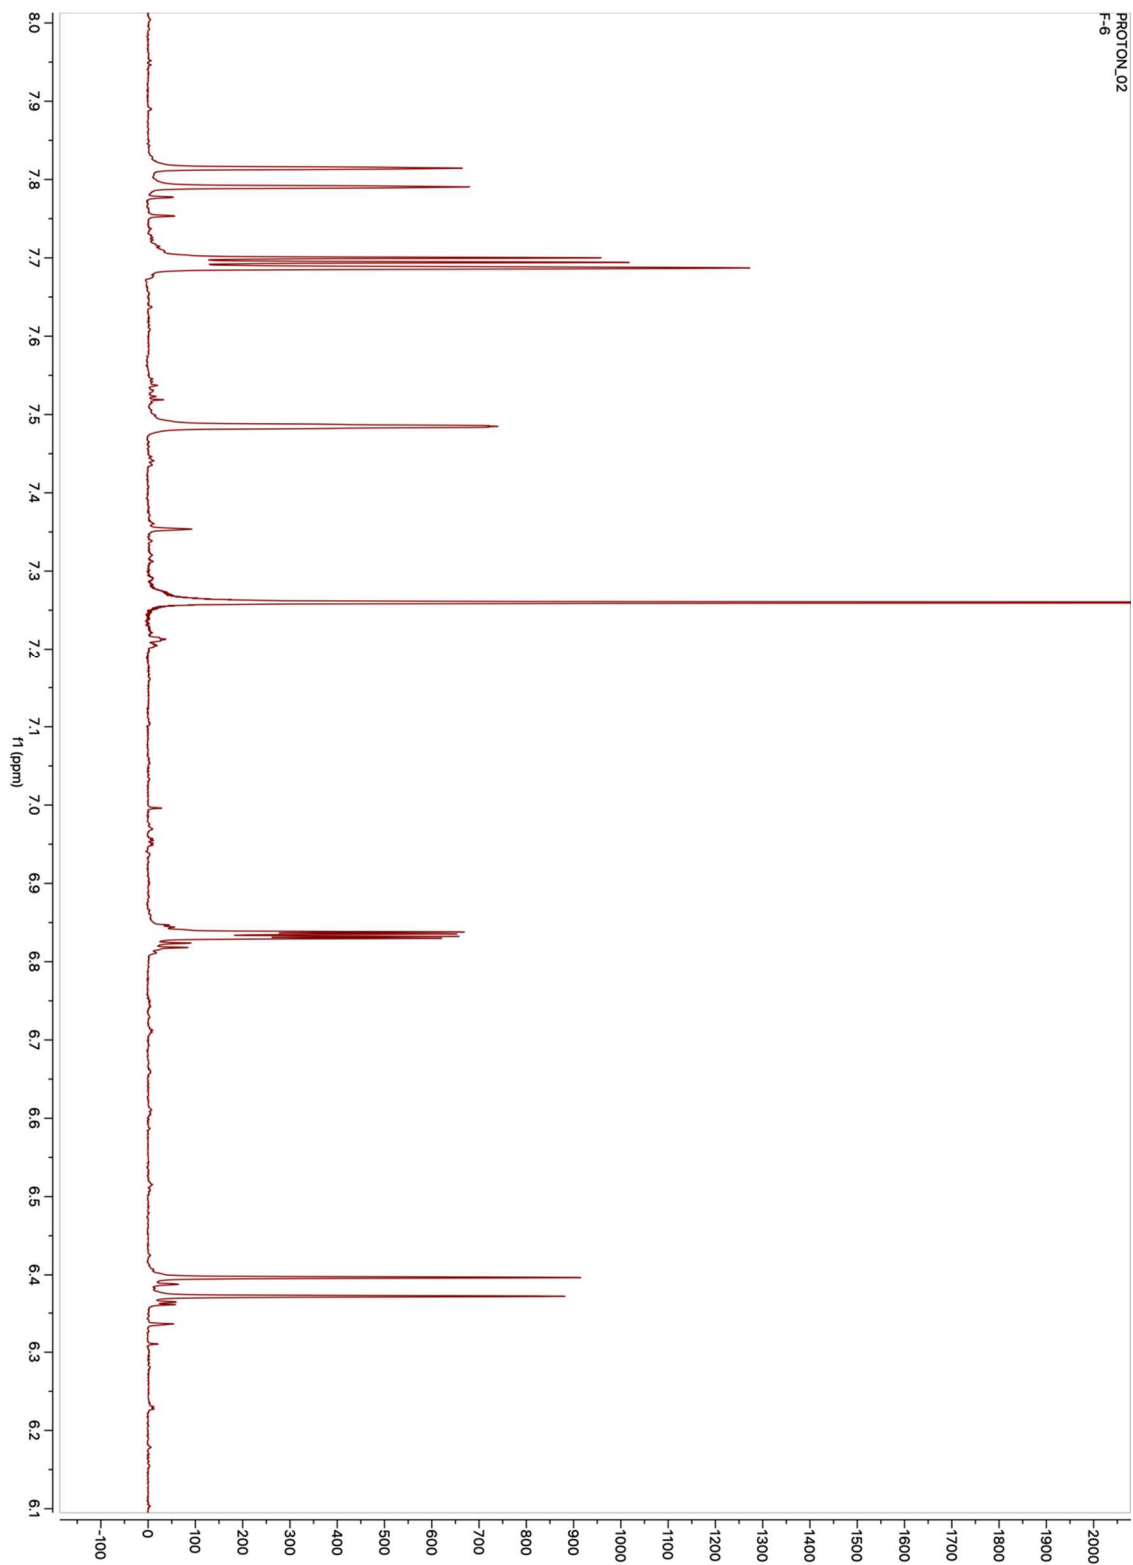

Fig. S25 Expanded <sup>1</sup>H NMR spectrum of Psoralen (6)

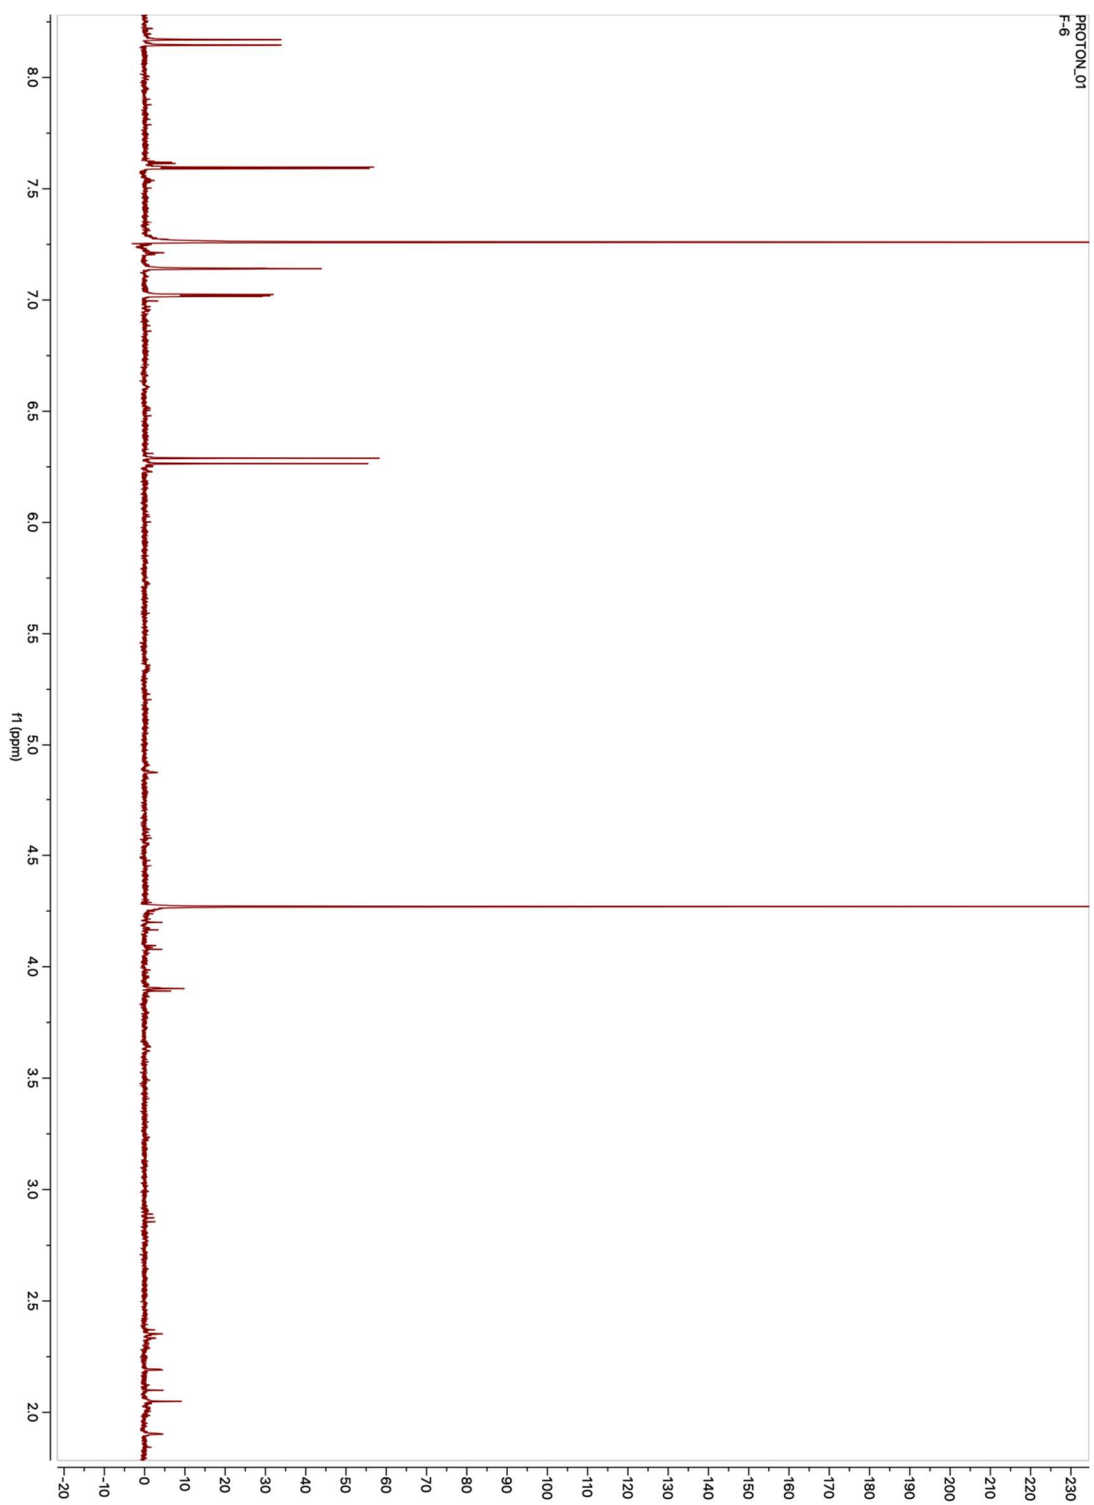

Fig. S26  $^1\text{H}$  NMR spectrum of Bergapten (7)

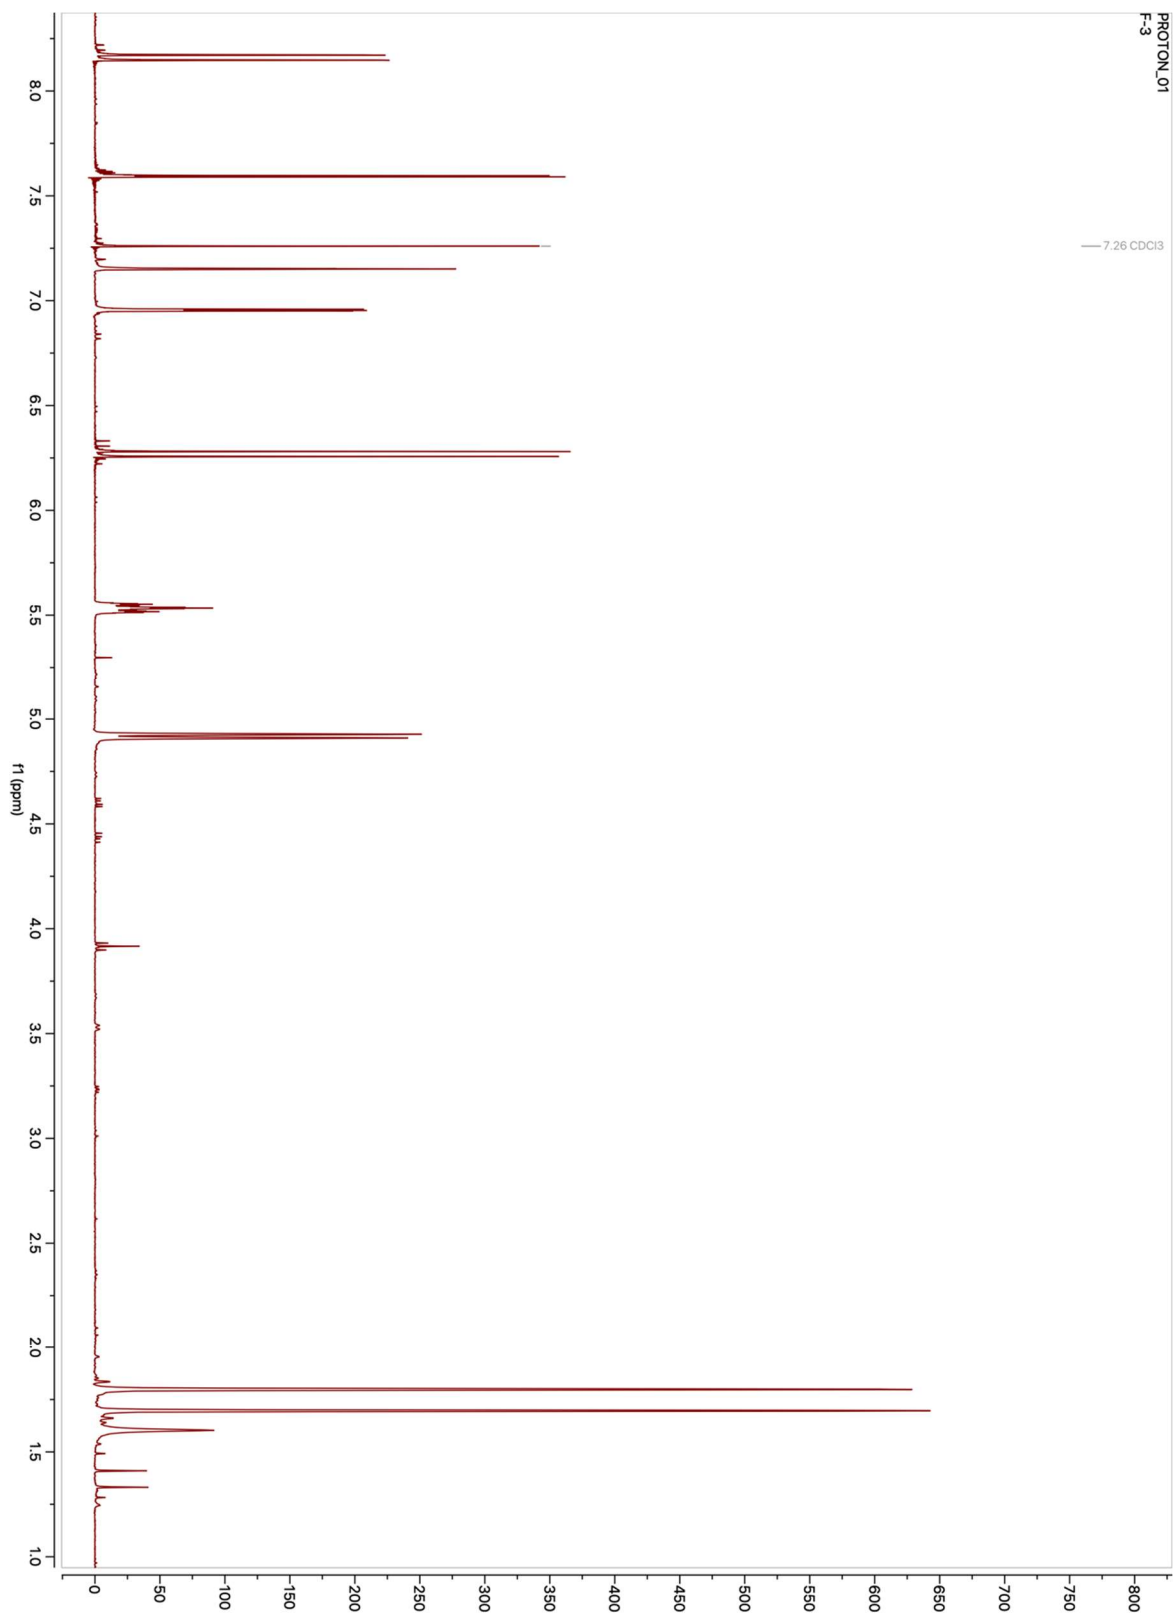

Fig. S27 <sup>1</sup>H NMR spectrum of Isoimperatorin (8)

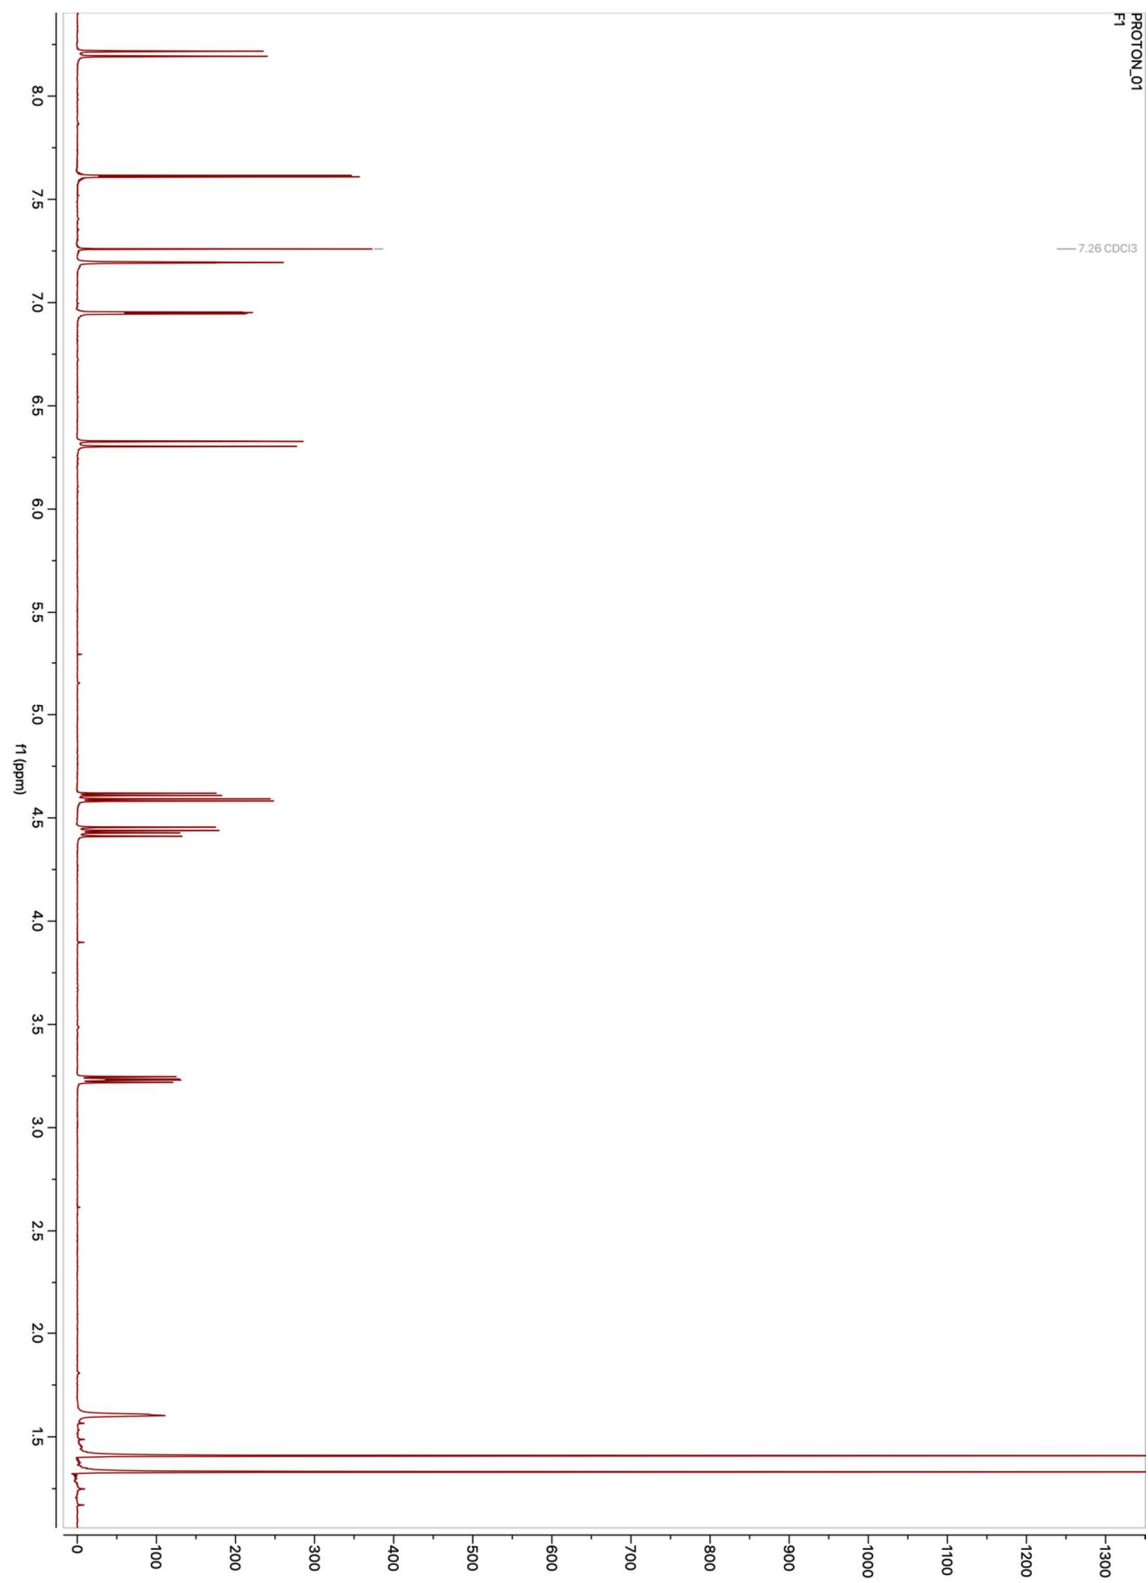

Fig. S28  $^1\text{H}$  NMR spectrum of Oxypeucedanin (9)

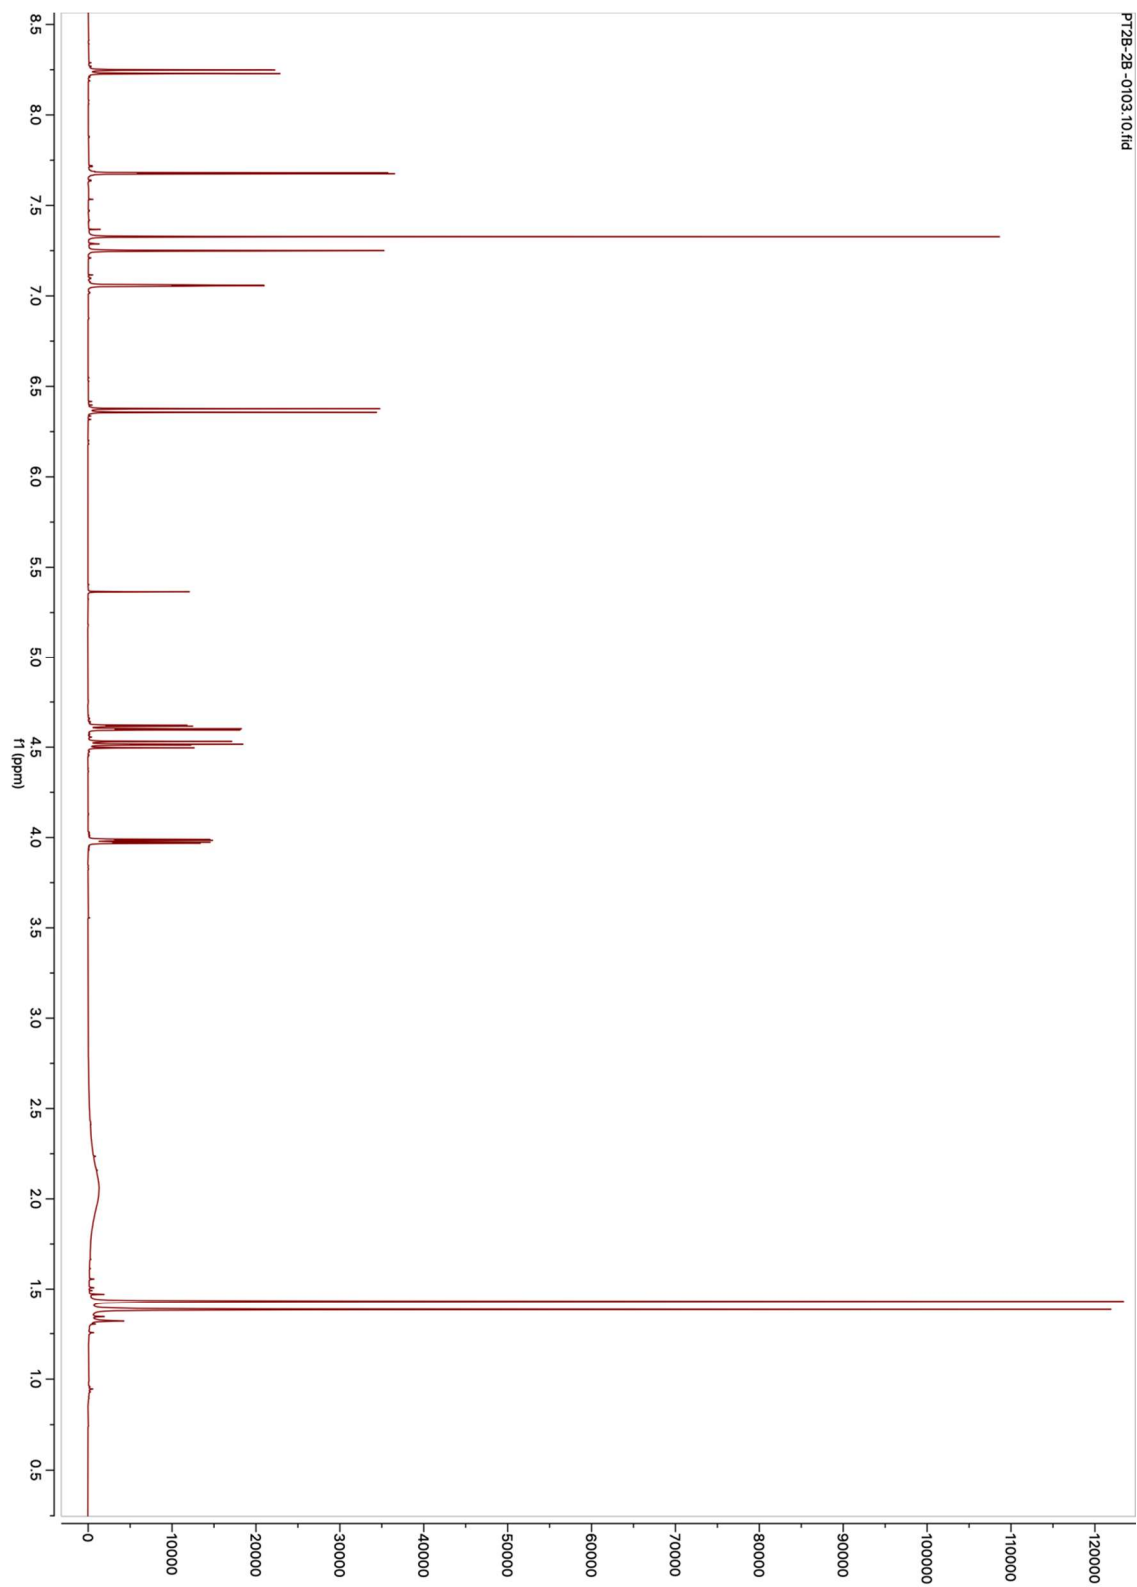

Fig. S29 <sup>1</sup>H NMR spectrum of Oxypeucedanin Hydrate (10)

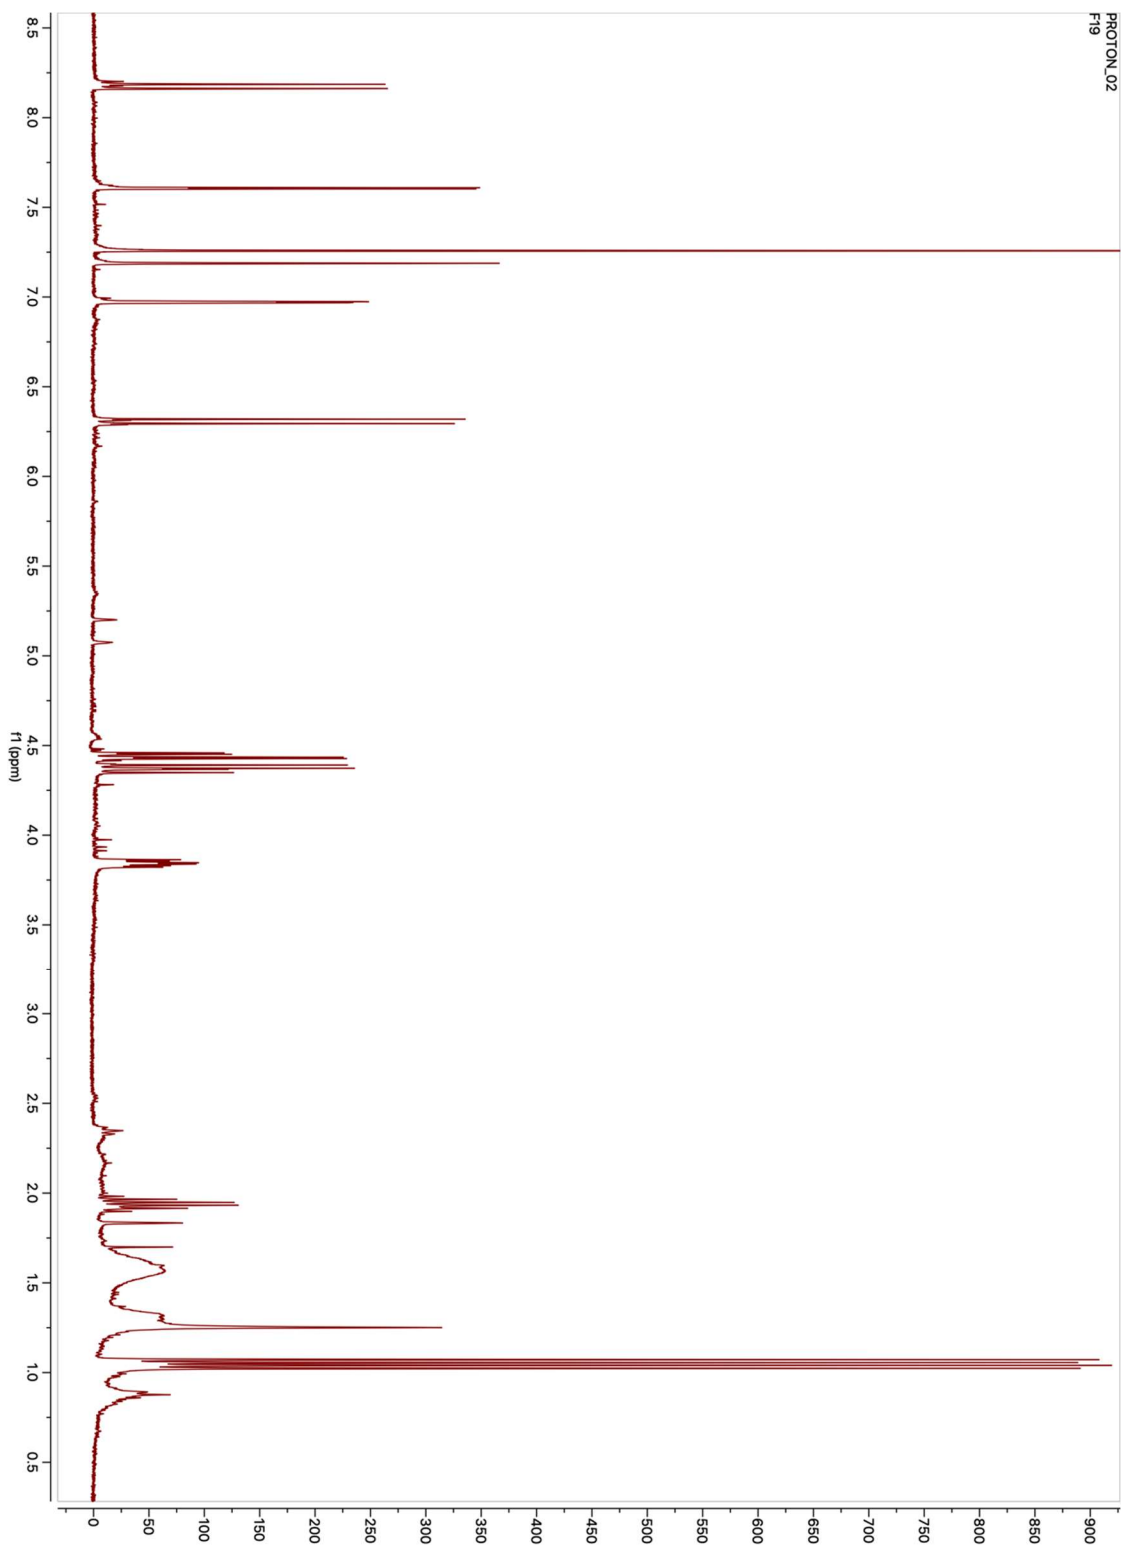

Fig. S30  $^1\text{H}$  NMR spectrum of Pranferol (11)



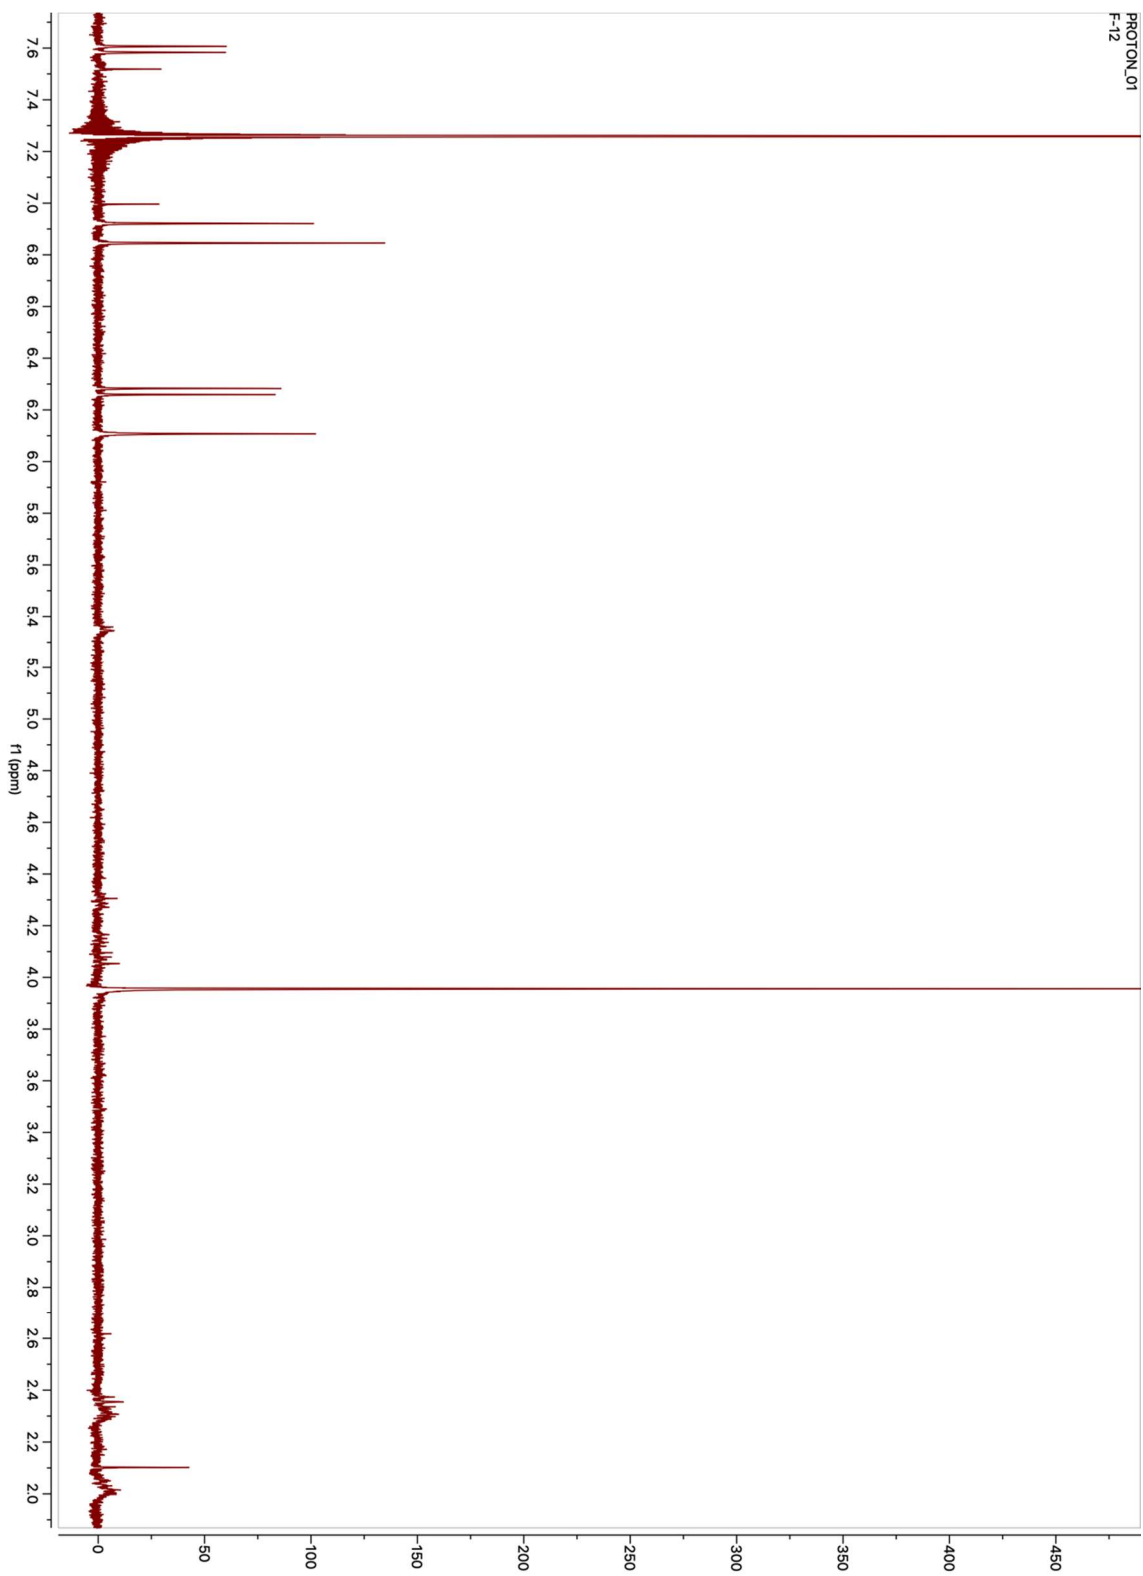

Fig. S31  $^1\text{H}$  NMR spectrum of Scopoletin (12)

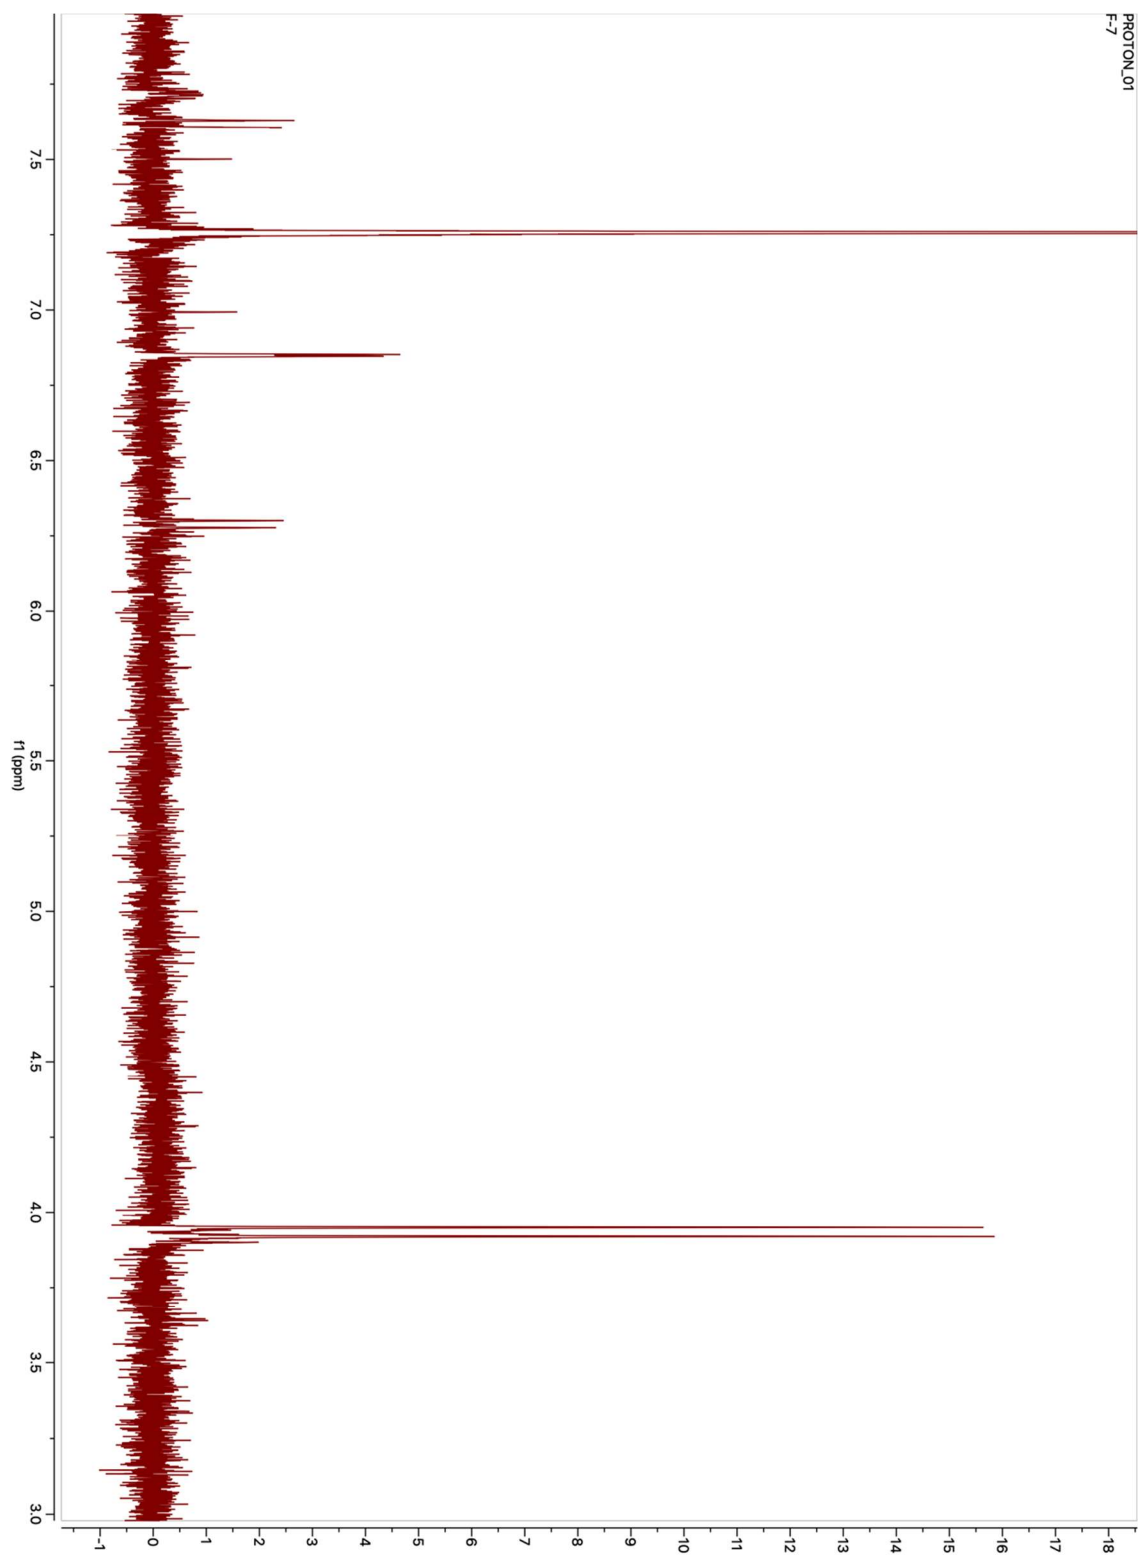

Fig. S32  $^1\text{H}$  NMR spectrum of Scoparone (13)
